# Supplementary material for: Simultaneous interlayer and intralayer space control in two-dimensional metal−organic frameworks for acetylene/ethylene separation
Source: PubMed Central journal article supplement (PMC7721749; doi:10.1038/s41467-020-20101-7), 2020-12-07
Supplement: 41467_2020_20101_MOESM1_ESM.pdf [file 41467_2020_20101_MOESM1_ESM.pdf]

## Supplementary Information

### **Simultaneous interlayer and intralayer space control in two-dimensional metal–organic frameworks for acetylene/ethylene separation**

Jin Shen<sup>+,1</sup>, Xin He<sup>+,2</sup>, Tian Ke<sup>1</sup>, Rajamani Krishna<sup>3</sup>, Jasper M. van Baten<sup>3</sup>, Rundao Chen<sup>1</sup>, Zongbi Bao<sup>1</sup>, Huabin Xing<sup>1</sup>, Mircea Dincă<sup>2</sup>, Zhiguo Zhang<sup>1</sup>, Qiwei Yang<sup>\*,1</sup>, and Qilong Ren<sup>1</sup>

<sup>1</sup>Key Laboratory of Biomass Chemical Engineering of Ministry of Education, College of Chemical and Biological Engineering, Zhejiang University, Hangzhou 310027, China. <sup>2</sup>Department of Chemistry, Massachusetts Institute of Technology, 77 Massachusetts Avenue, Cambridge, Massachusetts 02139, United States. <sup>3</sup>Van ‘t Hoff Institute for Molecular Sciences, University of Amsterdam, Science Park 904, 1098 XH Amsterdam, The Netherlands.

<sup>+</sup>These authors contributed equally to this work.

e-mail: yangqw@zju.edu.cn

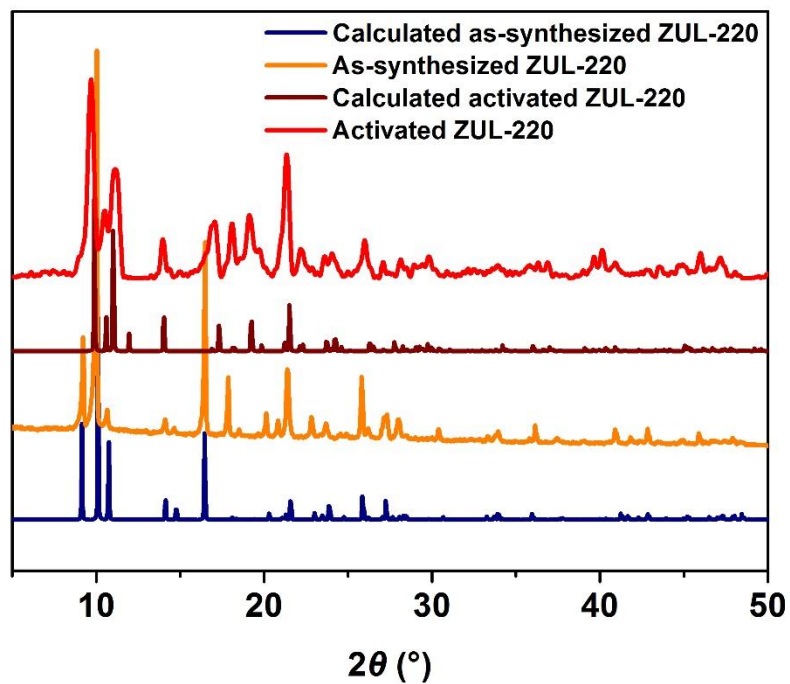

Supplementary Figure 1. The powder X-ray diffraction patterns of ZUL-220.

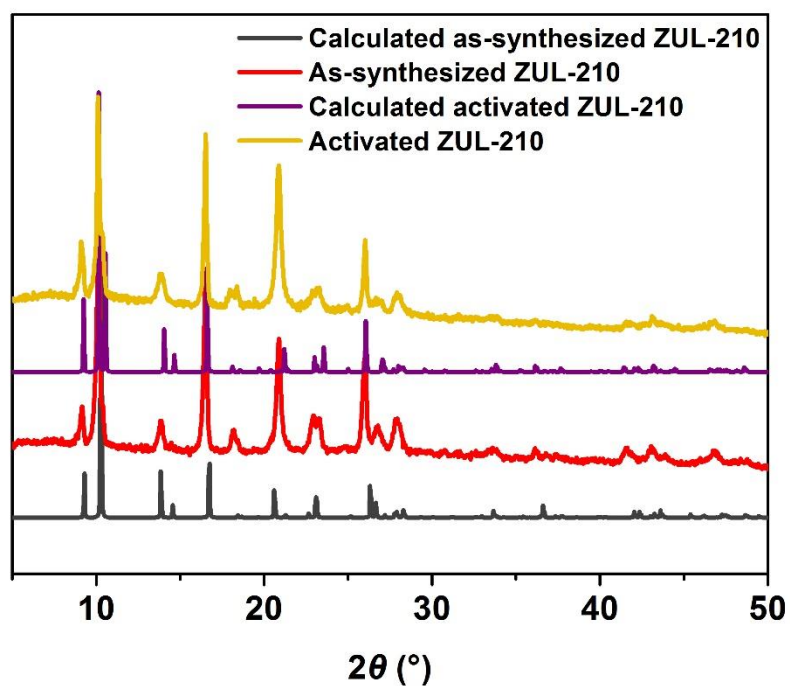

Supplementary Figure 2. The powder X-ray diffraction patterns of ZUL-210.

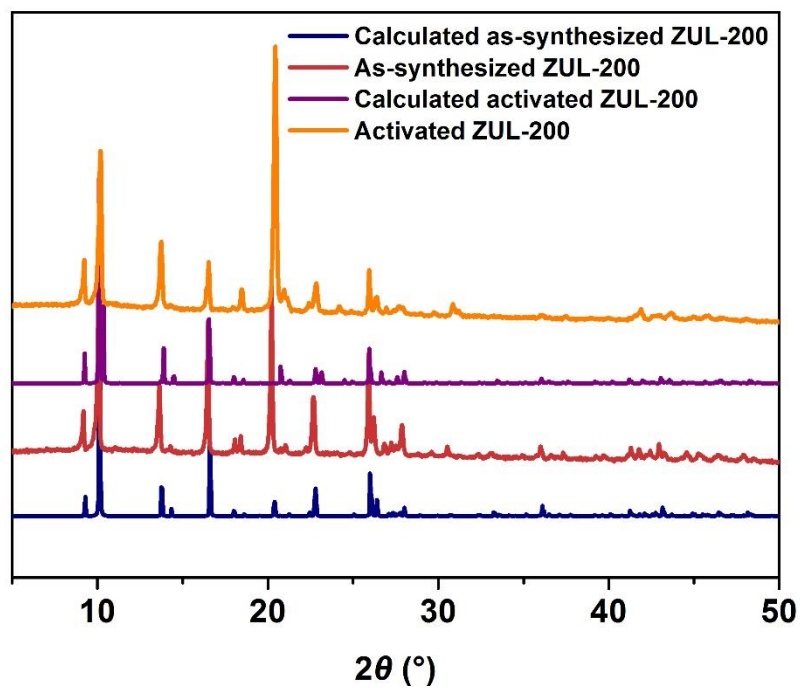

Supplementary Figure 3. The powder X-ray diffraction patterns of ZUL-200.

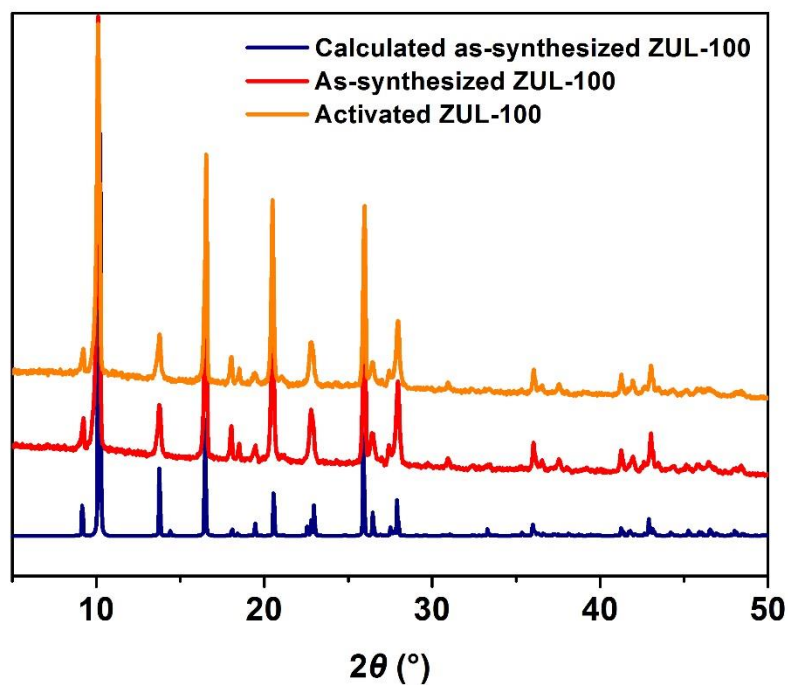

Supplementary Figure 4. The powder X-ray diffraction patterns of ZUL-100.

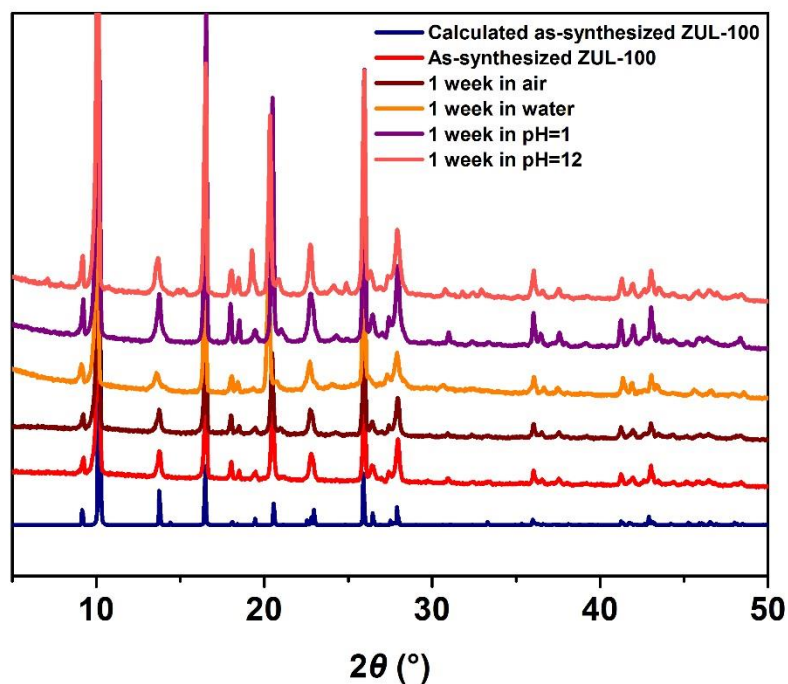

Supplementary Figure 5. The powder X-ray diffraction patterns of ZUL-100 after exposure to air, water, pH=1 aqueous solution and pH=12 aqueous solution.

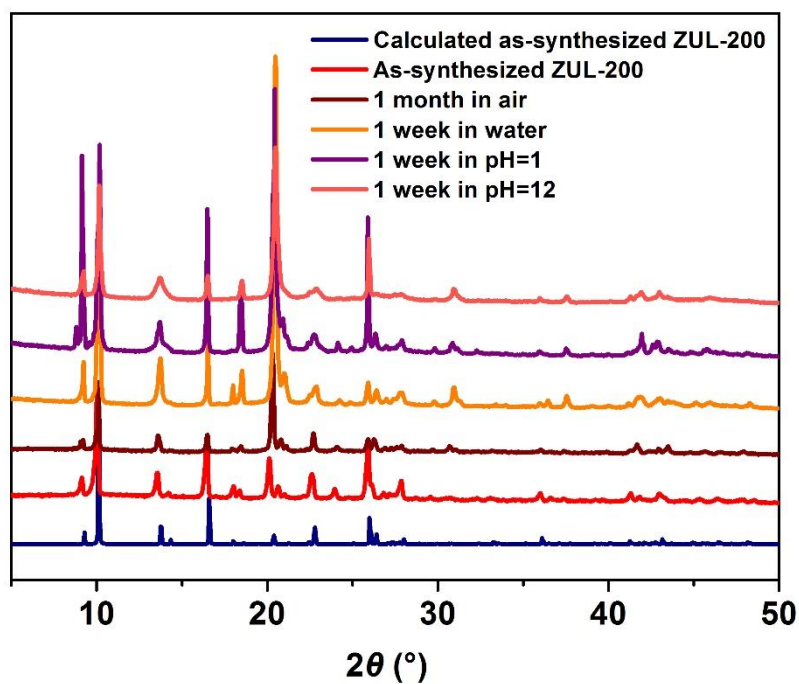

Supplementary Figure 6. The powder X-ray diffraction patterns of ZUL-200 after exposure to air, water, pH=1 aqueous solution and pH=12 aqueous solution.

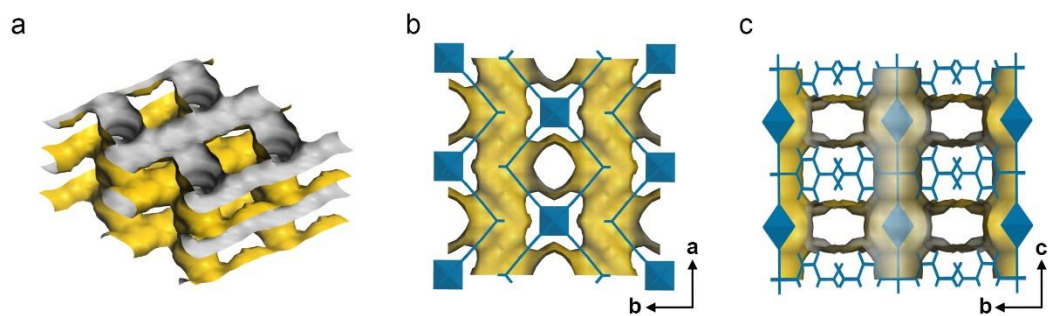

Supplementary Figure 7. Channel geometry of as-synthesized ZUL series materials (based on ZUL-100). Diagram of the cross-channel (a) viewed from (b) *c* axis and (c) *a* axis.

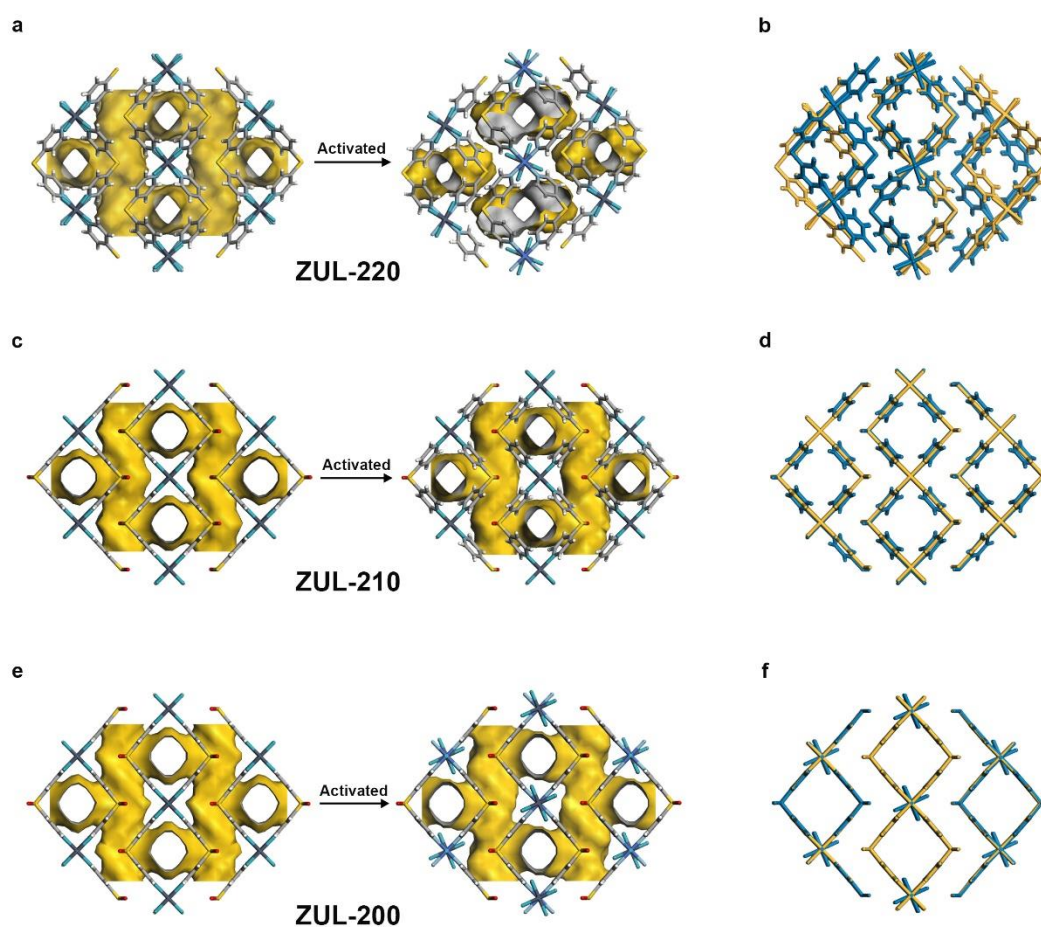

Supplementary Figure 8. (a) (c) (e) Porosity change during transformation from as-synthesized ZUL-220, ZUL-210, ZUL-200 to activated one, and (b) (d) (f) their corresponding cage units (yellow represents as-synthesized one and indigo represents activated one).

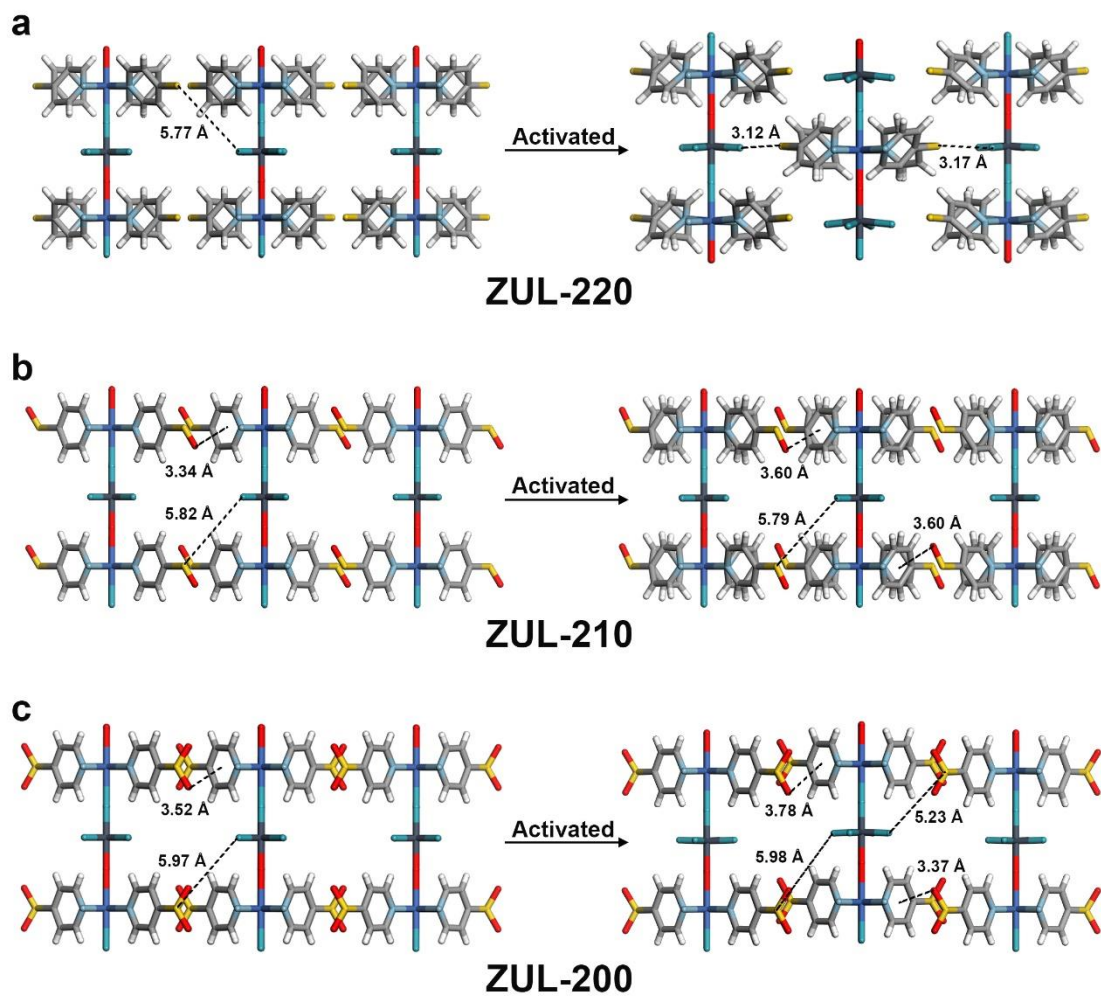

Supplementary Figure 9. The distances between S-F and O-pyridine ring change from as-synthesized to activated in (a) ZUL-220; (b) ZUL-210 and (c) ZUL-200.

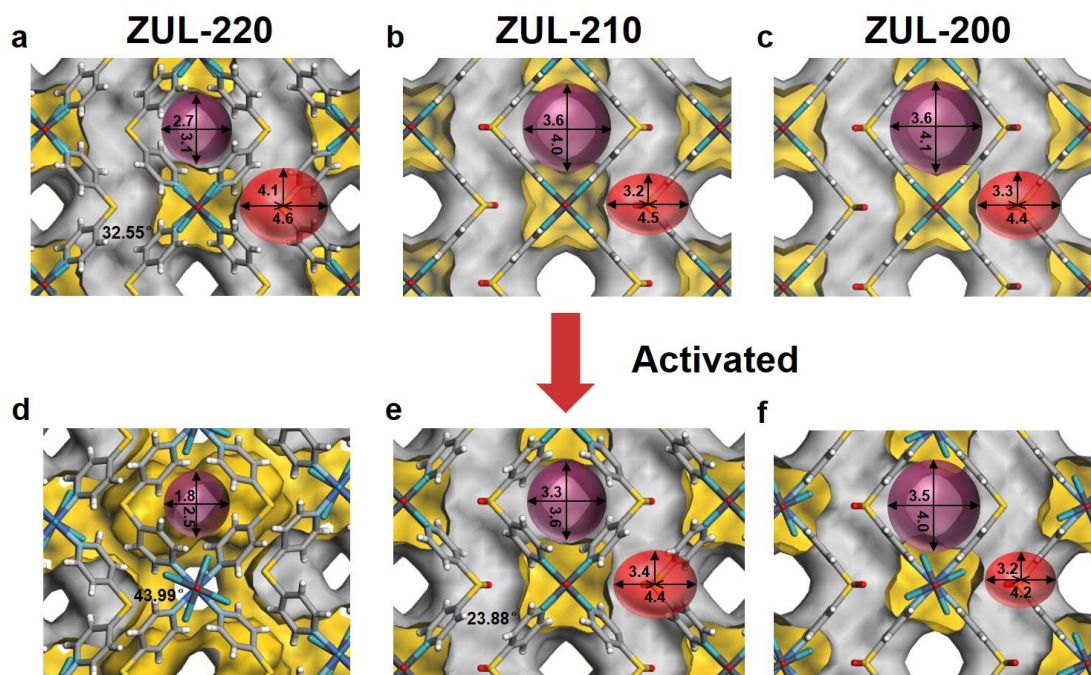

Supplementary Figure 10. Porosity change during transformation from as-synthesized ZUL-200, ZUL-210 and ZUL-200 to activated one.

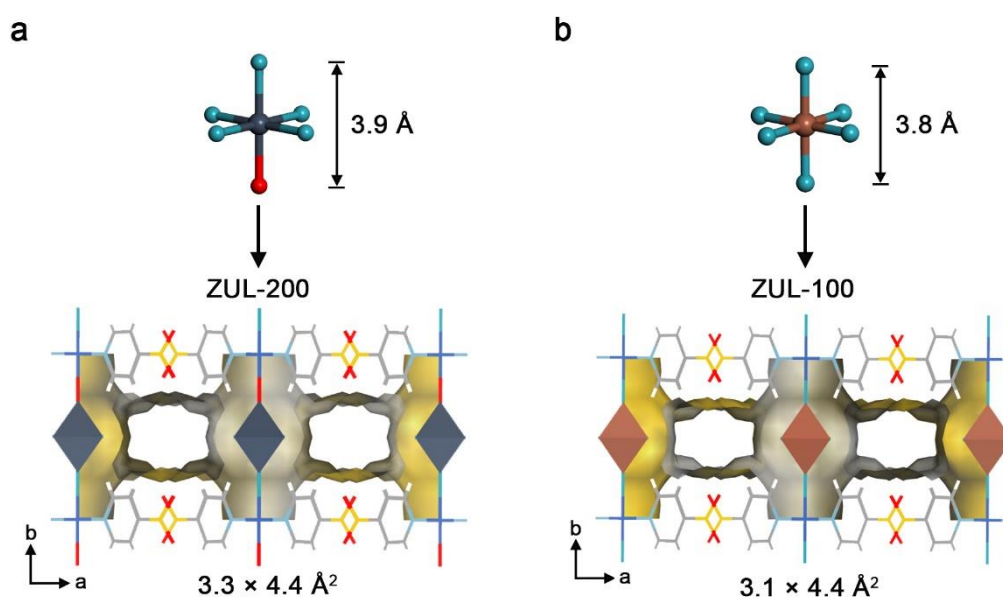

Supplementary Figure 11. The interlayer channels in ZUL-200 (a) and ZUL-100 (b).

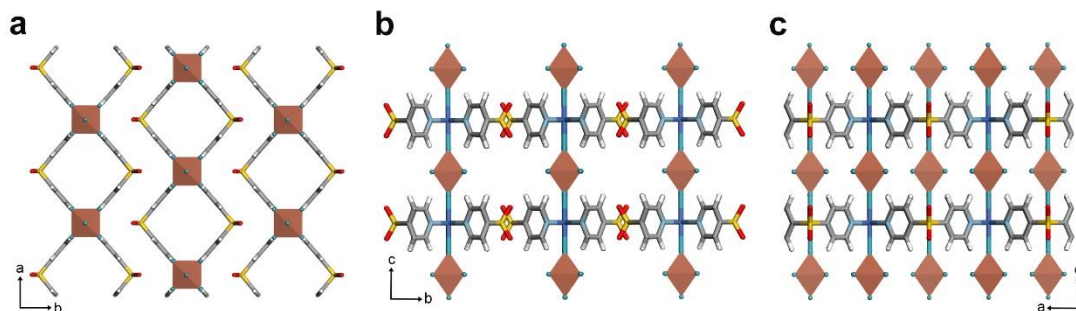

Supplementary Figure 12. The structure of ZUL-100 viewed from (a) *c* axis (b) *a* axis (c) *b* axis.

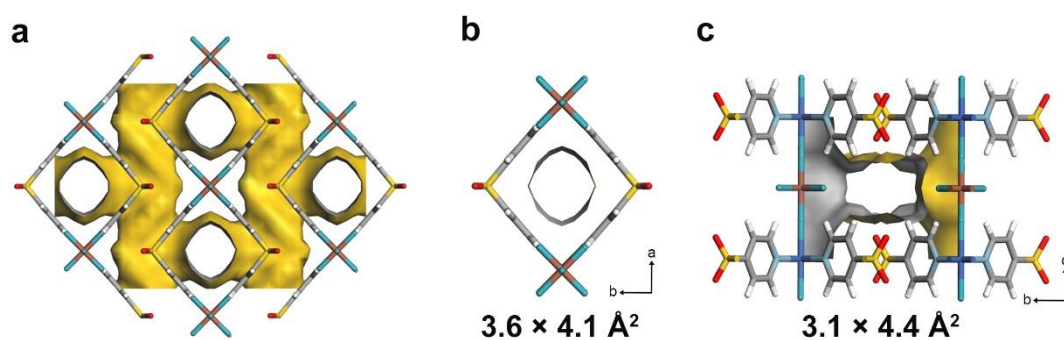

Supplementary Figure 13. Pore geometry of ZUL-100 (a) with intralayer (b) and interlayer (c) pore size.

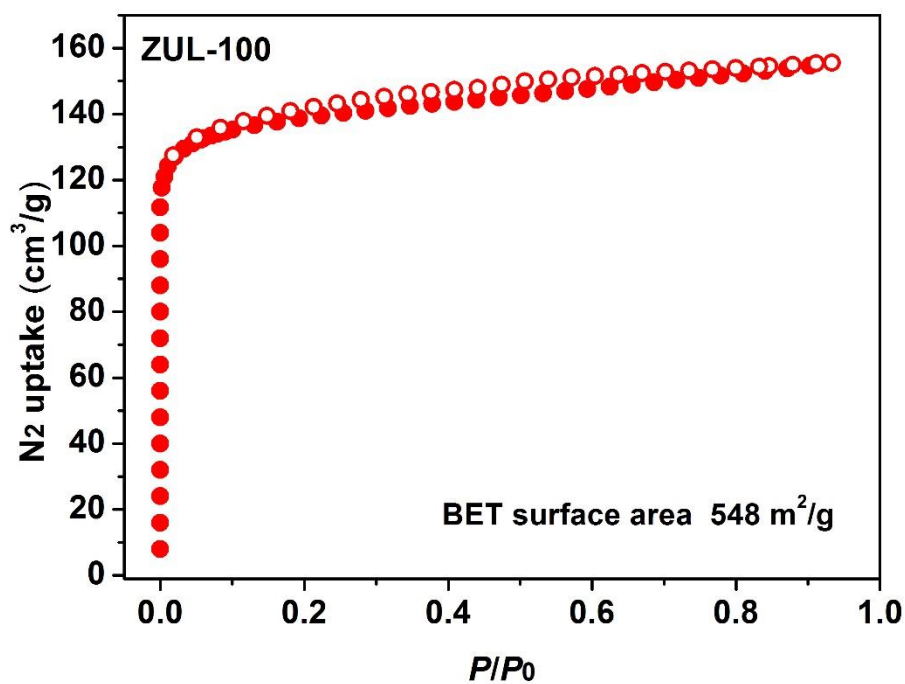

Supplementary Figure 14. N<sub>2</sub> adsorption isotherms of ZUL-100 at 77 K.



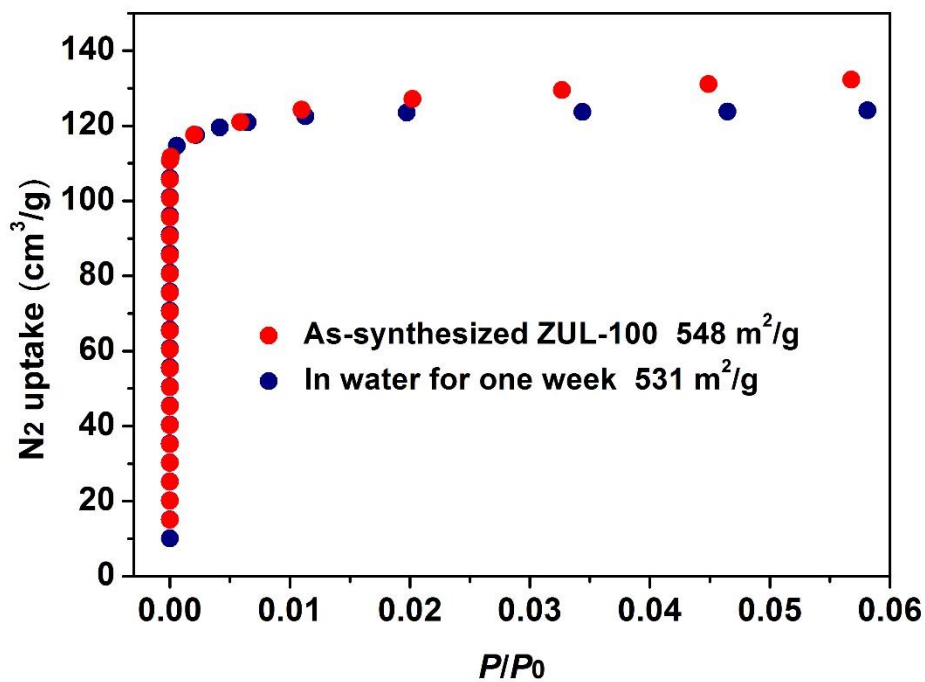

Supplementary Figure 15. 77 K N<sub>2</sub> adsorption isotherms of ZUL-100 (red) and ZUL-100 after soaking in water for one week.

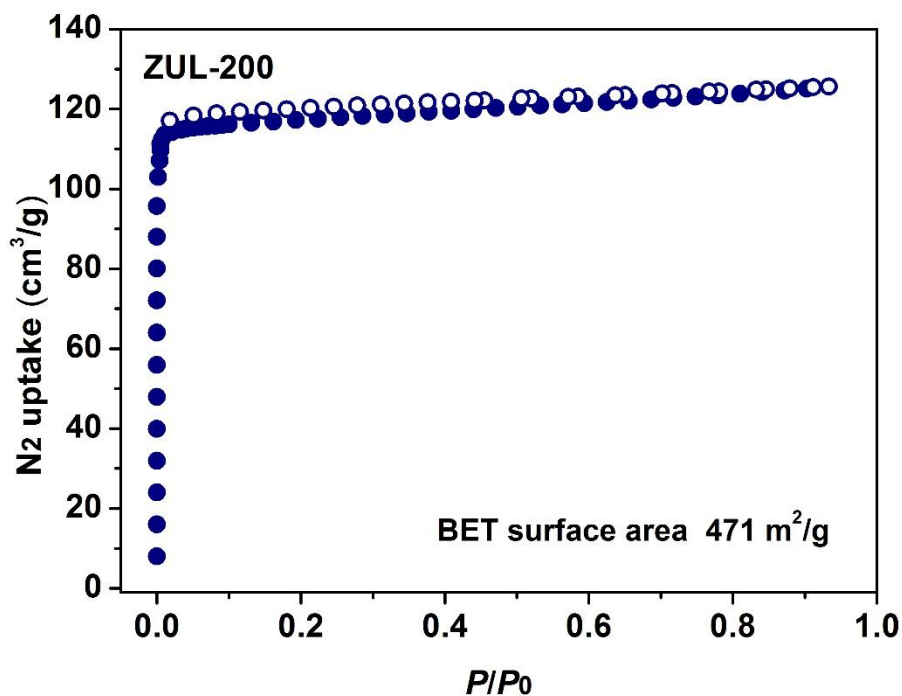

Supplementary Figure 16. N<sub>2</sub> adsorption isotherms of ZUL-200 at 77 K.

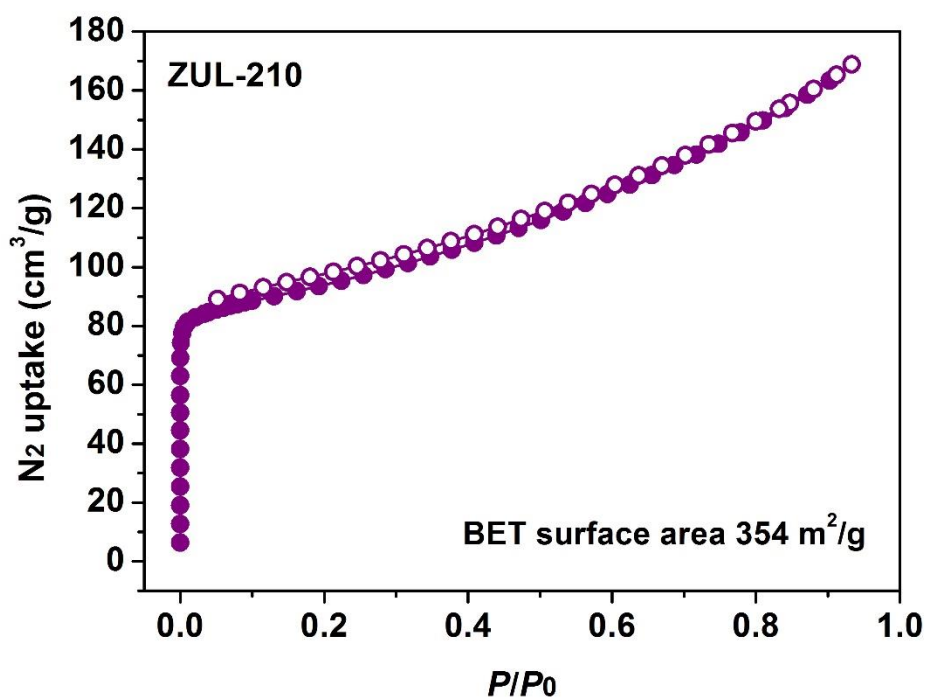

Supplementary Figure 17. N<sub>2</sub> adsorption isotherms of ZUL-210 at 77 K.

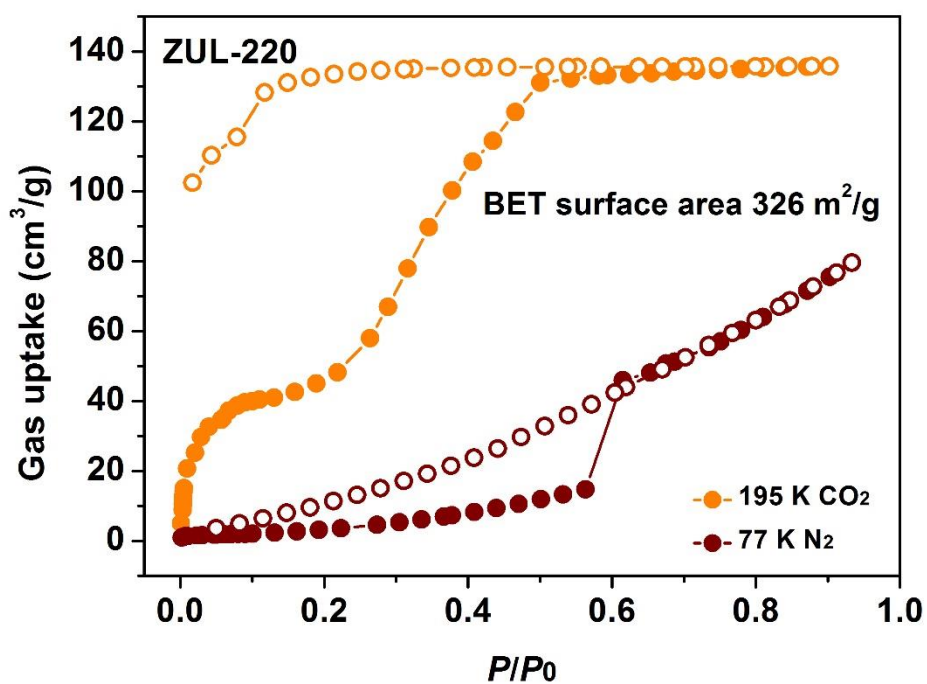

Supplementary Figure 18. 77 K N<sub>2</sub> adsorption isotherms and 196 K CO<sub>2</sub> adsorption isotherms of ZUL-220.

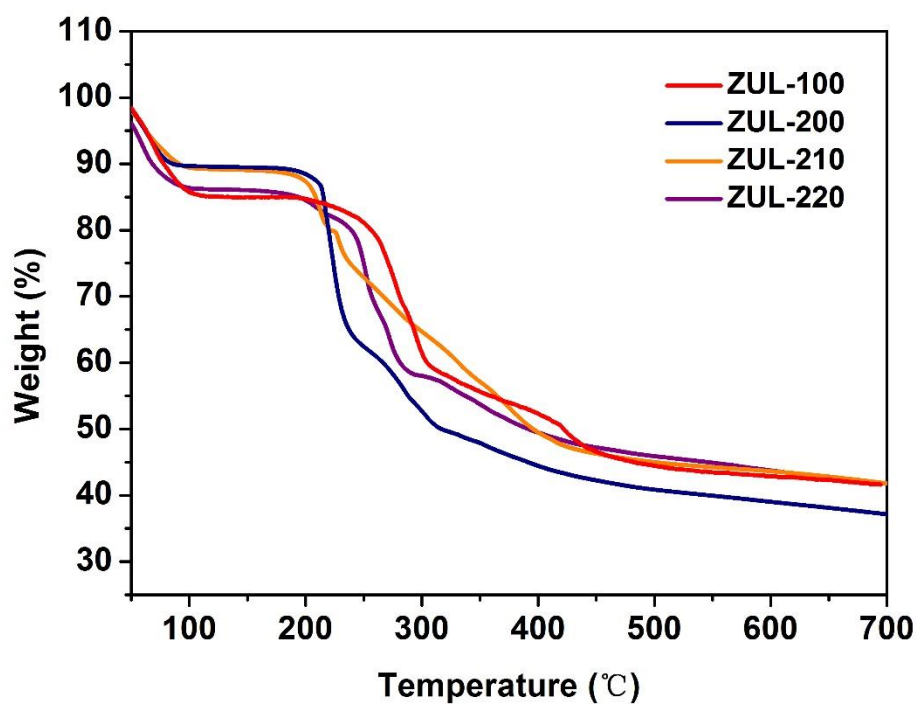

Supplementary Figure 19. TGA curves of as-synthesized ZUL-100, ZUL-200, ZUL-210 and ZUL-220.

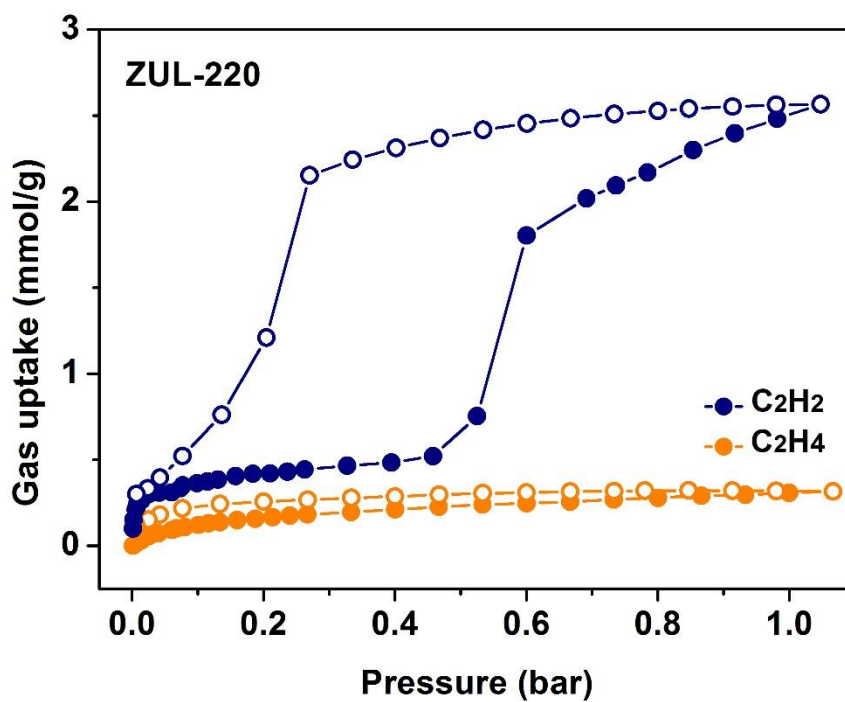

Supplementary Figure 20. Adsorption isotherms of C<sub>2</sub>H<sub>2</sub> and C<sub>2</sub>H<sub>4</sub> on ZUL-220 at 298 K. Adsorption and desorption are represented by closed and open symbols, respectively.

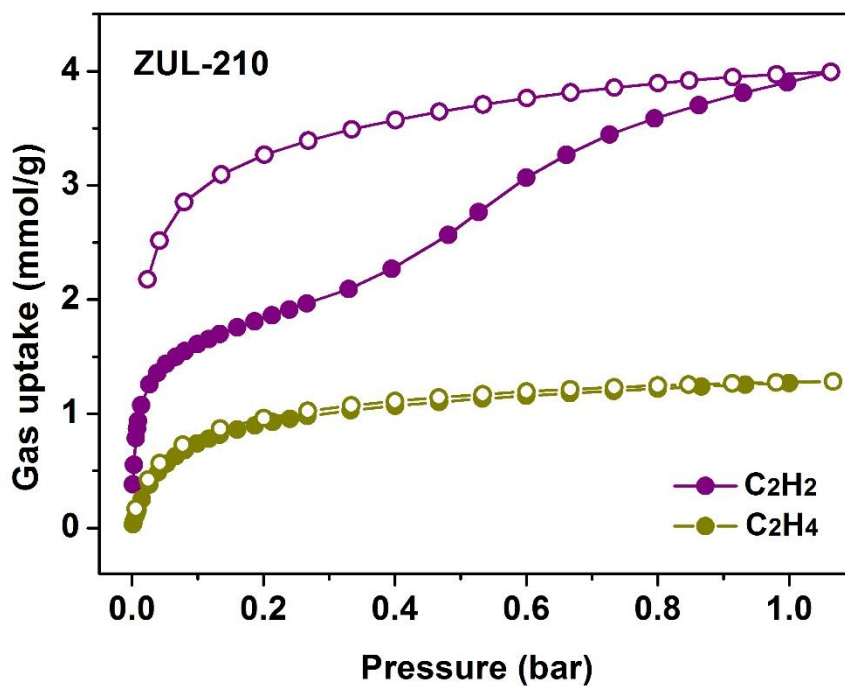

Supplementary Figure 21. The adsorption isotherms of C<sub>2</sub>H<sub>2</sub> and C<sub>2</sub>H<sub>4</sub> on ZUL-210 at 298 K. Adsorption and desorption are represented by closed and open symbols, respectively.

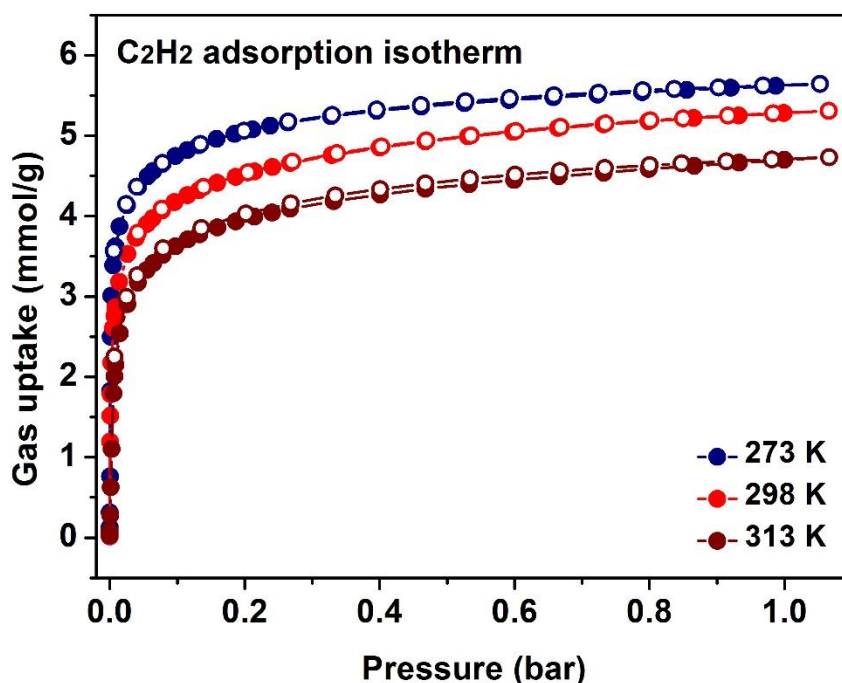

Supplementary Figure 22. The adsorption isotherms of C<sub>2</sub>H<sub>2</sub> on ZUL-100 at temperature from 273 to 313 K. Adsorption and desorption are represented by closed and open symbols, respectively.

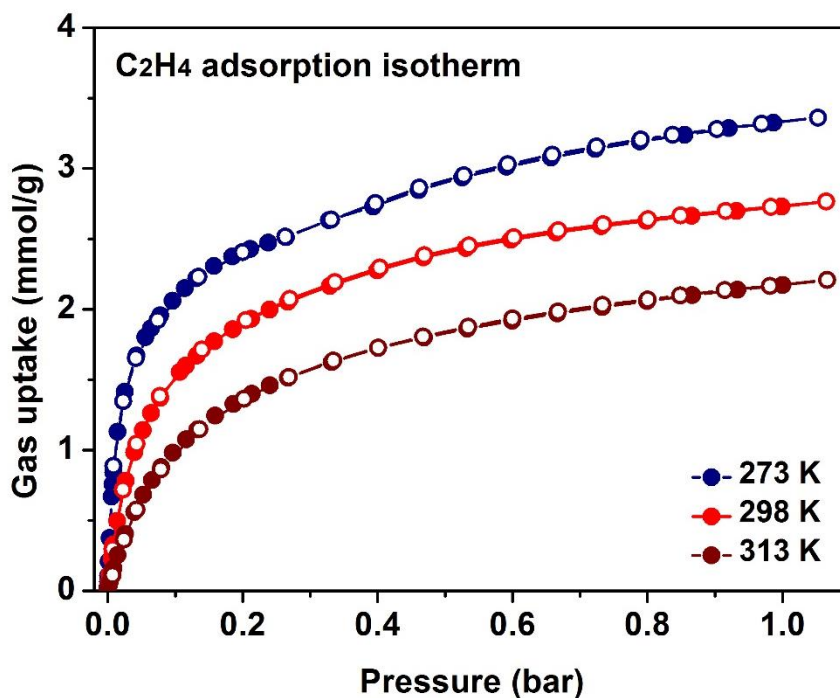

Supplementary Figure 23. The adsorption isotherms of C<sub>2</sub>H<sub>4</sub> on ZUL-100 at temperature from 273 to 313 K. Adsorption and desorption are represented by closed and open symbols, respectively.

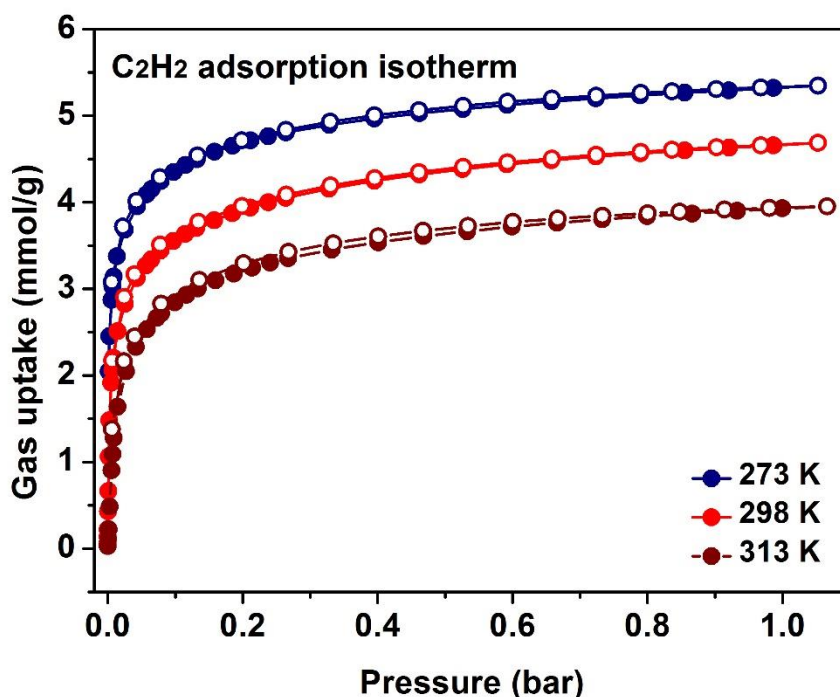

Supplementary Figure 24. The adsorption isotherms of C<sub>2</sub>H<sub>2</sub> on ZUL-200 at temperature from 273 to 313 K. Adsorption and desorption are represented by closed and open symbols, respectively.

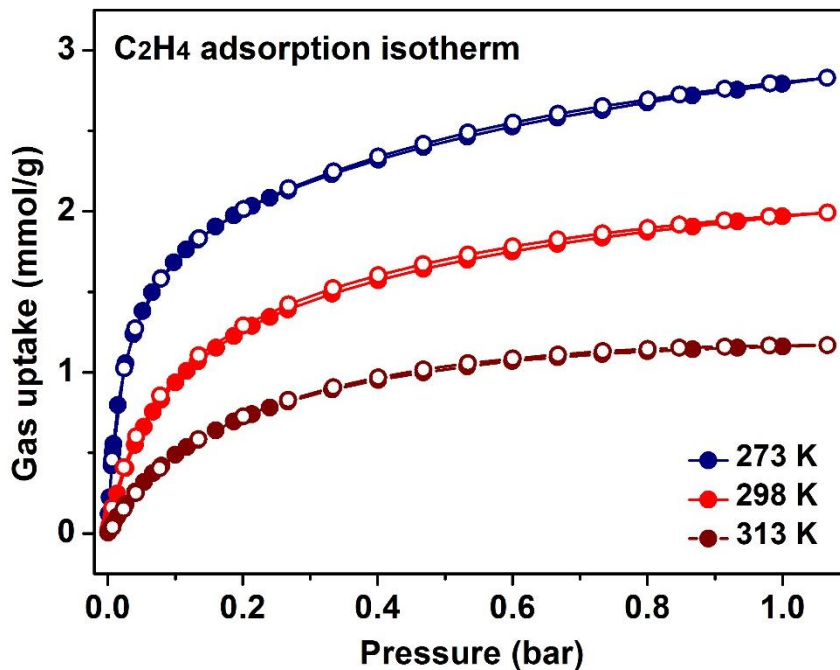

Supplementary Figure 25. The adsorption isotherms of C<sub>2</sub>H<sub>4</sub> on ZUL-200 at temperature from 273 to 313 K. Adsorption and desorption are represented by closed and open symbols, respectively.

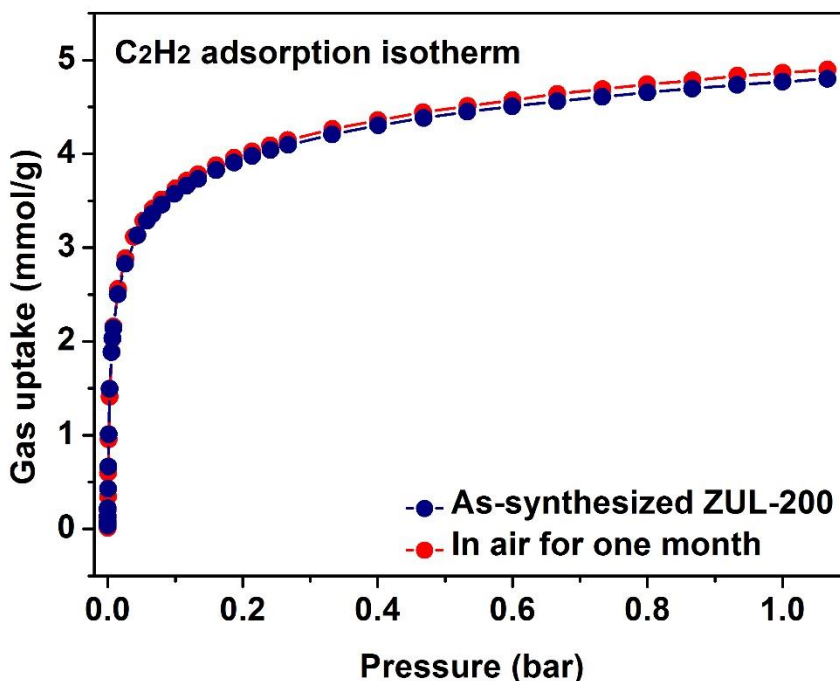

Supplementary Figure 26. The C<sub>2</sub>H<sub>2</sub> adsorption isotherms on ZUL-200 after exposure to air for one month at 298 K. Adsorption and desorption are represented by closed and open symbols, respectively.

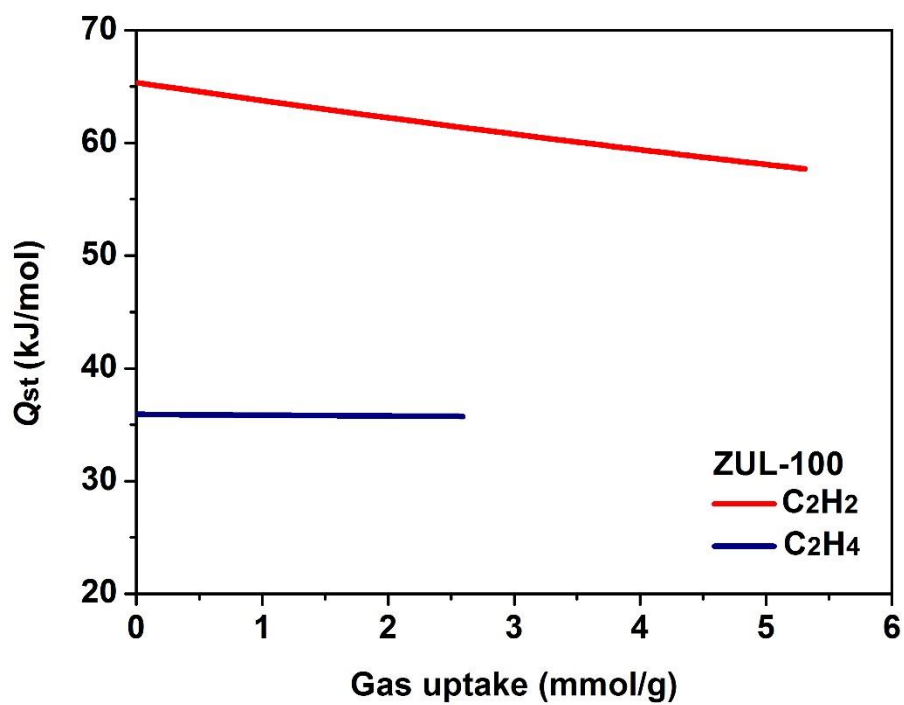

Supplementary Figure 27.  $Q_{st}$  of C<sub>2</sub>H<sub>2</sub> and C<sub>2</sub>H<sub>4</sub> adsorption in ZUL-100.

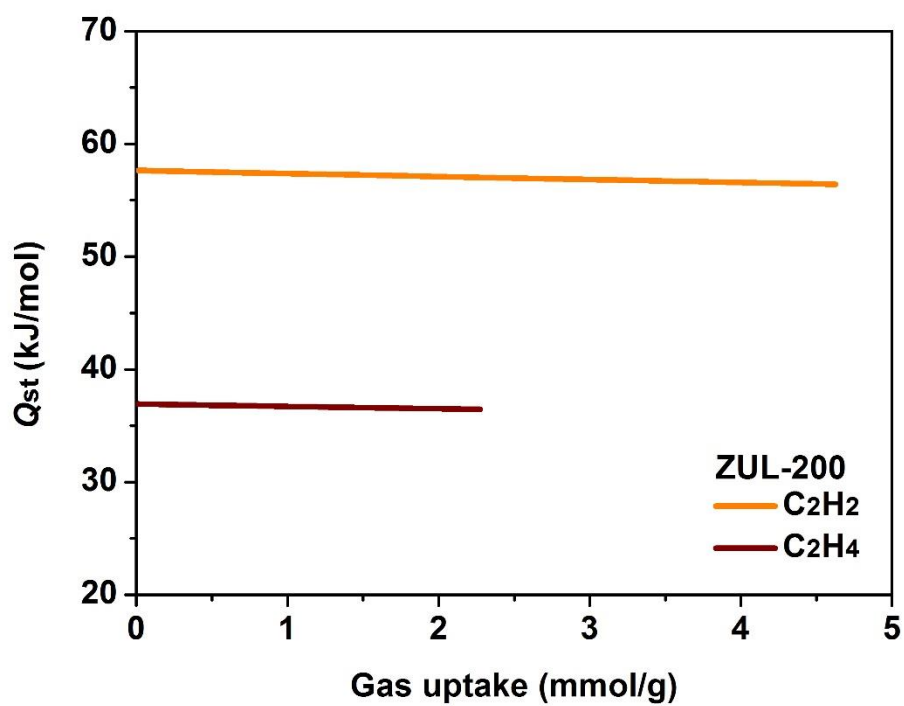

Supplementary Figure 28.  $Q_{st}$  of C<sub>2</sub>H<sub>2</sub> and C<sub>2</sub>H<sub>4</sub> adsorption in ZUL-200.

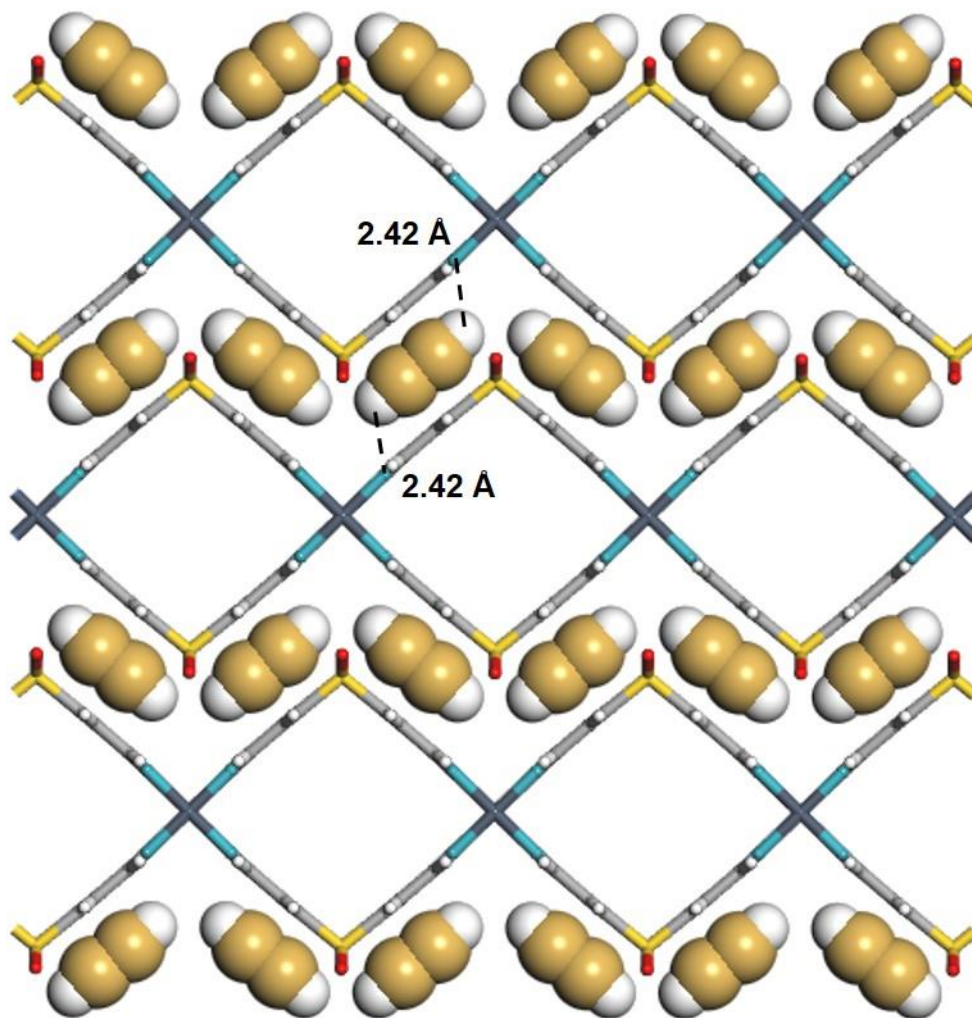

Supplementary Figure 29. The crystal structure of ZUL-200 under C<sub>2</sub>H<sub>2</sub> (C<sub>2</sub>H<sub>2</sub>@ZUL-200) at ultralow pressure (Color code: F, teal; Nb, plain blue; C, gray; H, white; N, sky blue; S, yellow; O, red; Cu, blue; C (in C<sub>2</sub>H<sub>2</sub>), golden).



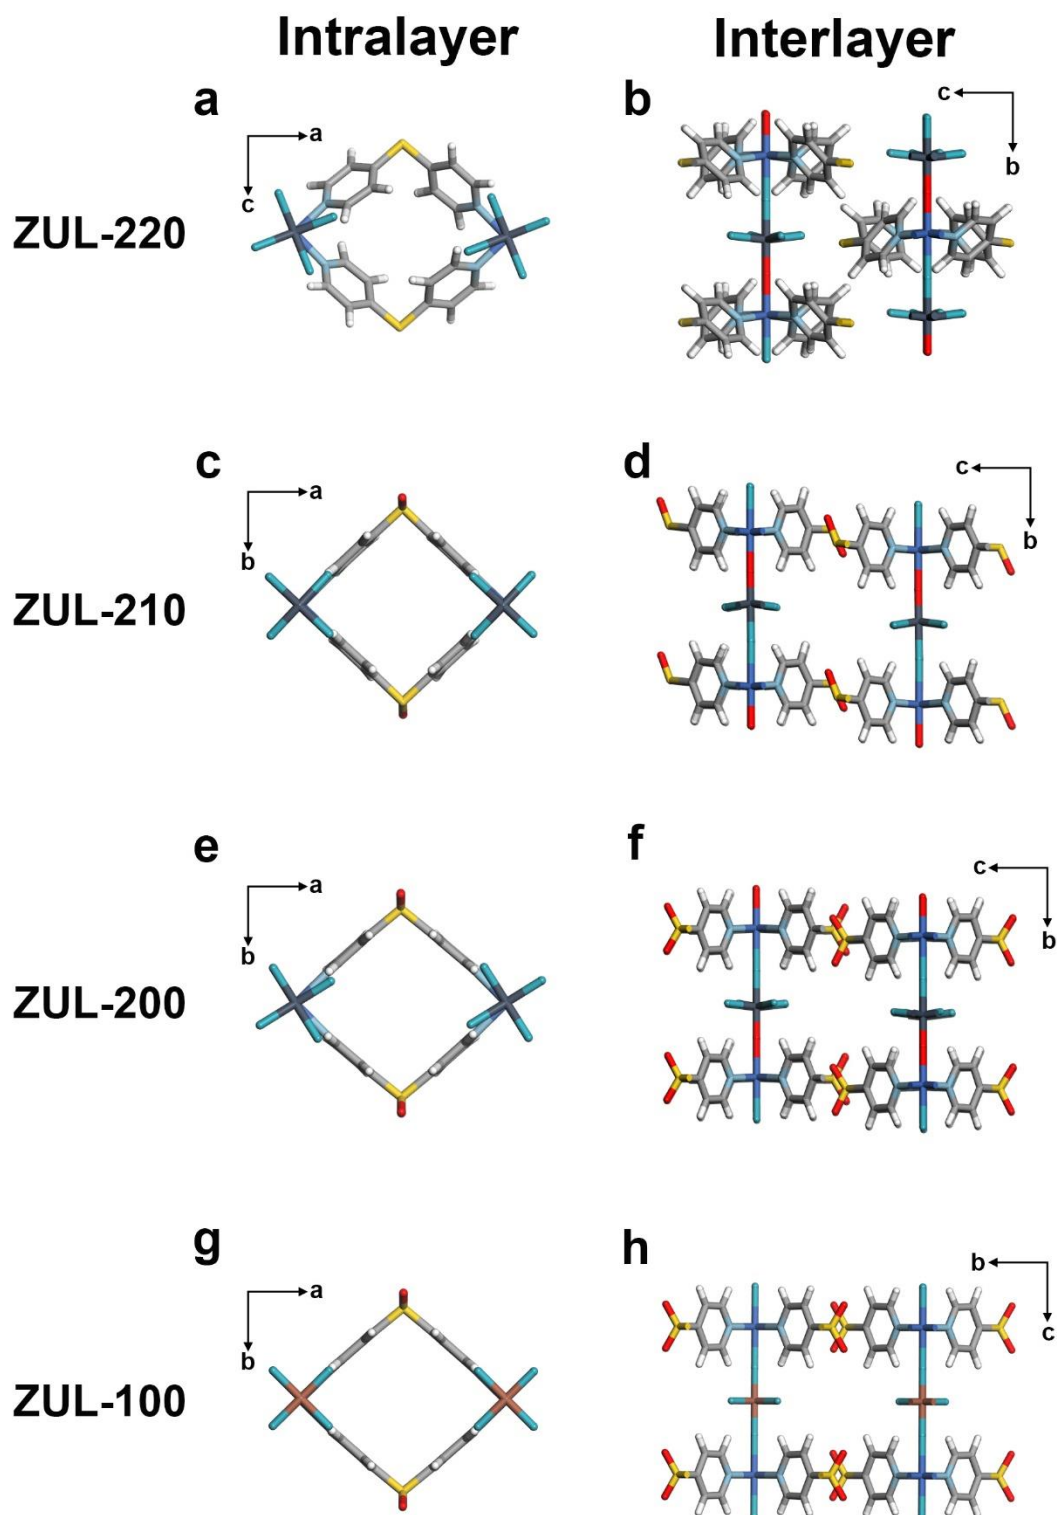

Supplementary Figure 30. DFT optimized geometry of MOFs (Color code: F, teal; Nb, plain blue; Ti, brown; C, gray; H, white; N, sky blue; S, yellow; O, red; Cu, blue).

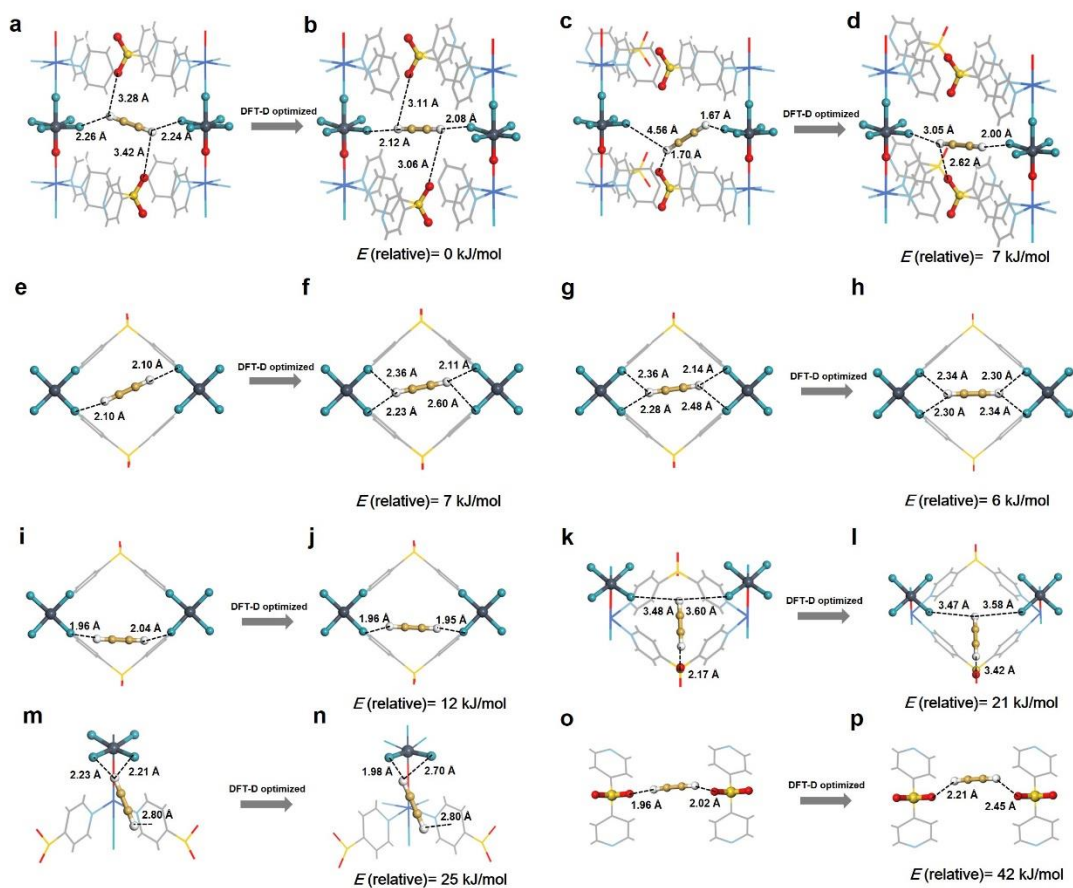

Supplementary Figure 31. Initial configurations  $\text{C}_2\text{H}_2$  adsorption sites of ZUL-200 and DFT-D optimized configurations with their relative energy (the difference with the energy of configuration *b*) (Color code: F, teal; Nb, plain blue; C (in framework), gray; H, white; N, sky blue; S, yellow; O, red; Cu, blue; C (in  $\text{C}_2\text{H}_2$ ), golden).

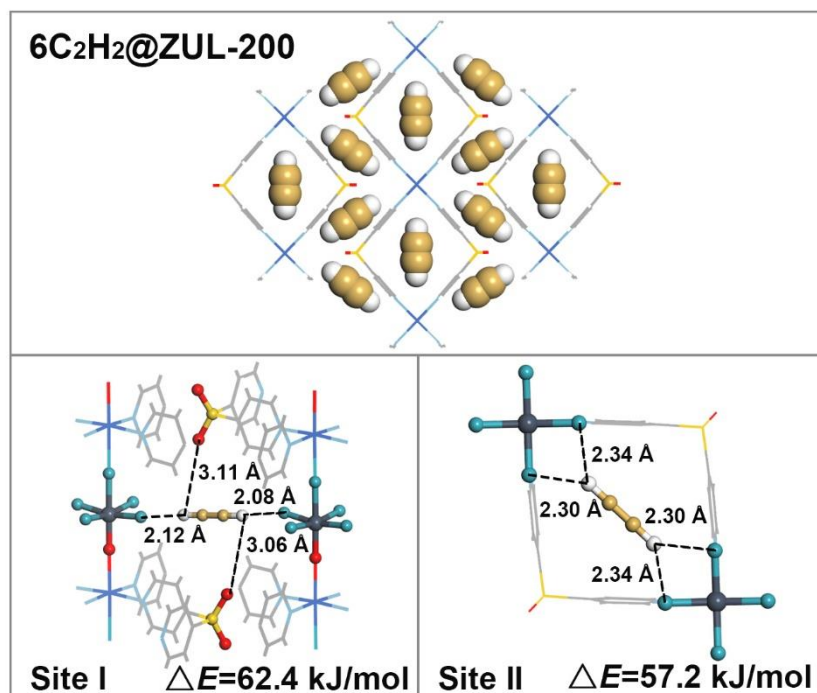

Supplementary Figure 32. DFT-D optimized C<sub>2</sub>H<sub>2</sub> adsorption sites of 6C<sub>2</sub>H<sub>2</sub>@ZUL-200 (Color code: F, teal; Nb, plain blue; C (in framework), gray; H, white; N, sky blue; S, yellow; O, red; Cu, blue; C (in C<sub>2</sub>H<sub>2</sub>), golden).

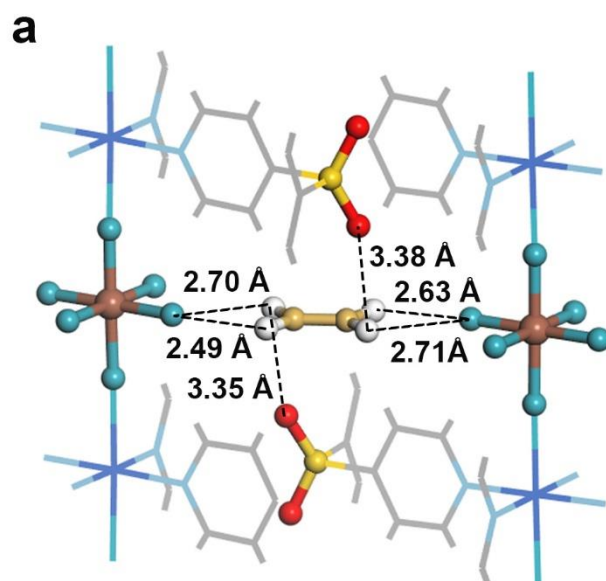

$\Delta E=41.5$  kJ/mol

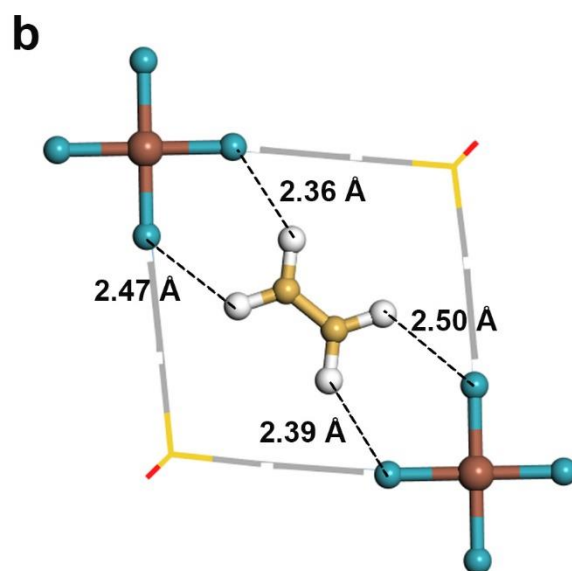

$\Delta E=41.5$  kJ/mol

Supplementary Figure 33. DFT-D optimized  $C_2H_4$  adsorption sites of ZUL-100 (Color code: F, teal; Ti, brown; C (in framework), gray; H, white; N, sky blue; S, yellow; O, red; Cu, blue; C (in  $C_2H_4$ ), golden).

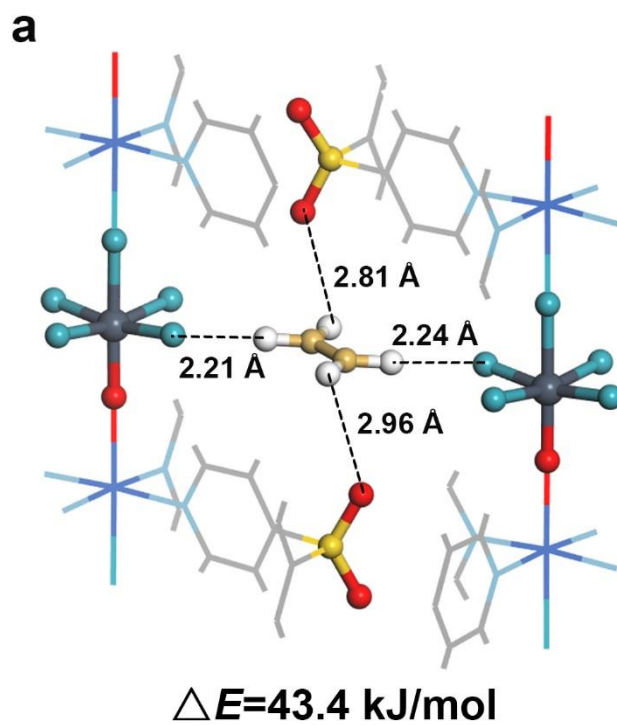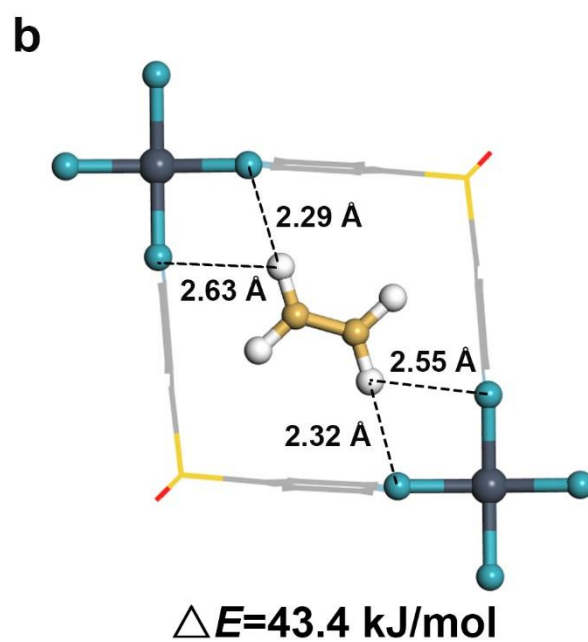

Supplementary Figure 34. DFT-D optimized  $C_2H_4$  adsorption sites of ZUL-200 (Color code: F, teal; Nb, plain blue; C (in framework), gray; H, white; N, sky blue; S, yellow; O, red; Cu, blue; C (in  $C_2H_4$ ), golden).

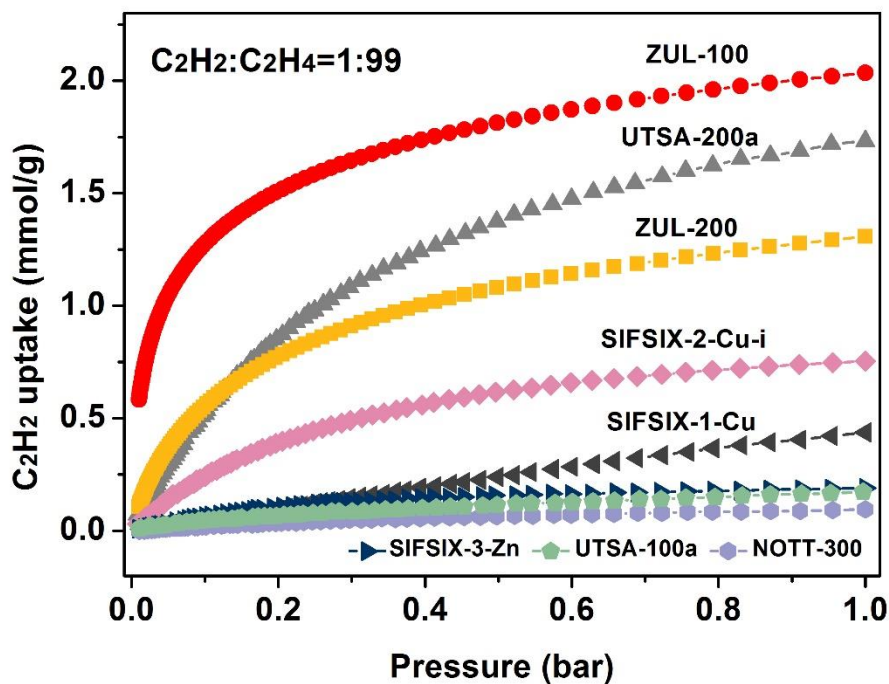

Supplementary Figure 35. Simulated  $C_2H_2$  uptake of  $C_2H_2/C_2H_4$  (1/99) mixture on various MOF materials at 298 K

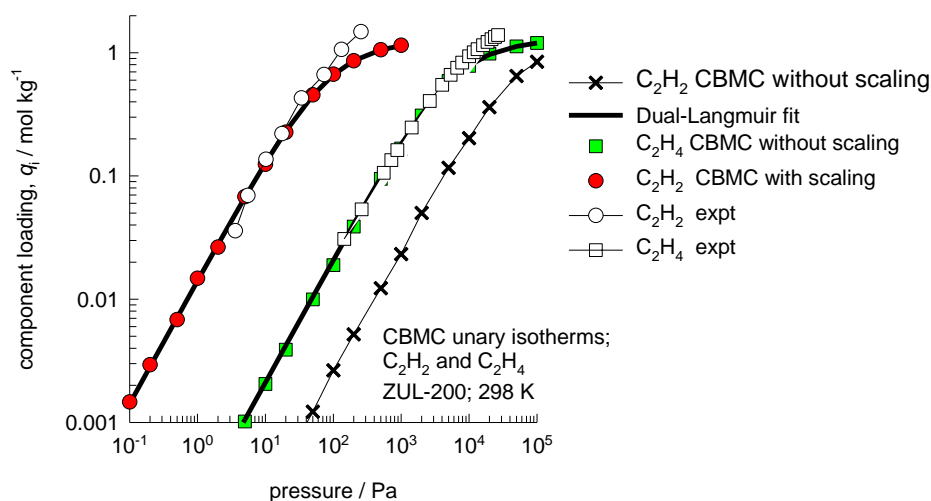

Supplementary Figure 36. Comparing CBMC simulations of unary isotherms for  $C_2H_2$  (crosses: without scaling; red circles with scaling) and  $C_2H_4$  (without scaling) in ZUL-200 at 298 K with experimental data on unary isotherms in the Henry regime.

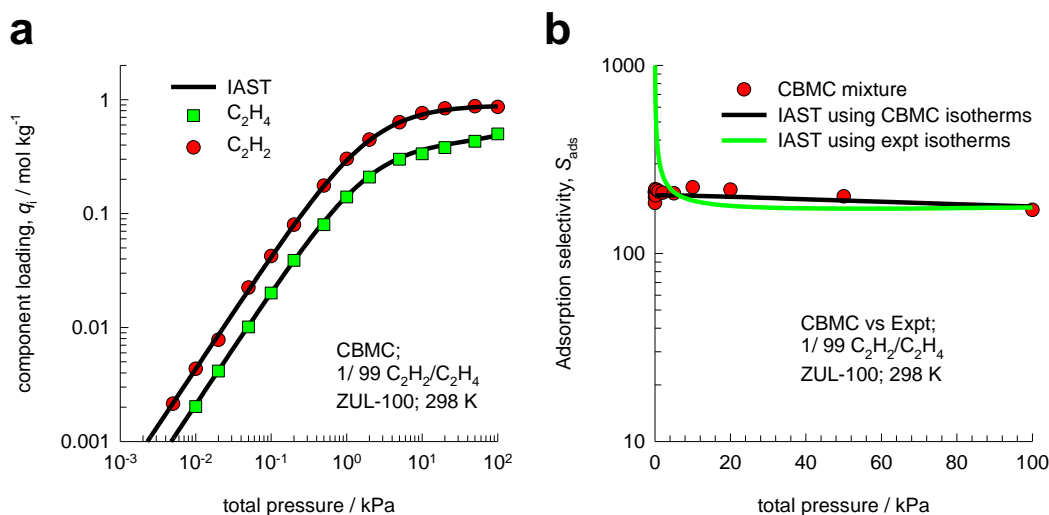

Supplementary Figure 37. (a) CBMC simulations for adsorption of 1/99 C<sub>2</sub>H<sub>2</sub>/C<sub>2</sub>H<sub>4</sub> mixtures in ZUL-100 at 298 K. The continuous solid lines are IAST calculations of adsorption equilibrium using the dual-Langmuir fits of unary isotherms. (b) CBMC simulations for adsorption selectivity of 1/99 C<sub>2</sub>H<sub>2</sub>/C<sub>2</sub>H<sub>4</sub> mixtures in ZUL-100 at 298 K. The continuous solid lines are IAST calculations using unary isotherms fitted with CBMC data and experimental data.

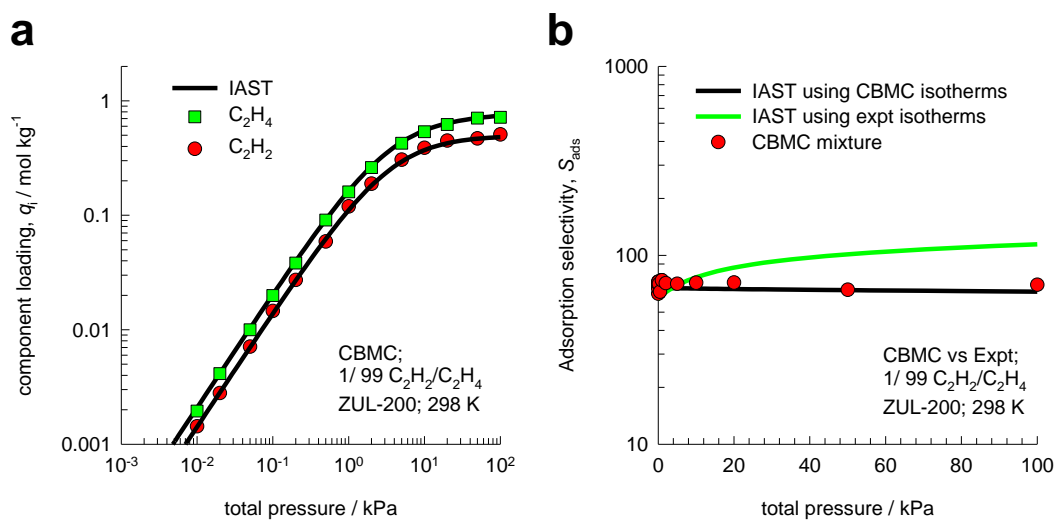

Supplementary Figure 38. (a) CBMC simulations for adsorption of 1/99 C<sub>2</sub>H<sub>2</sub>/C<sub>2</sub>H<sub>4</sub> mixtures in ZUL-200 at 298 K. The continuous solid lines are IAST calculations of adsorption equilibrium using the dual-Langmuir fits of unary isotherms. (b) CBMC simulations for adsorption selectivity of 1/99 C<sub>2</sub>H<sub>2</sub>/C<sub>2</sub>H<sub>4</sub> mixtures in ZUL-200 at 298 K. The continuous solid lines are IAST calculations using unary isotherms fitted with CBMC data and experimental data.

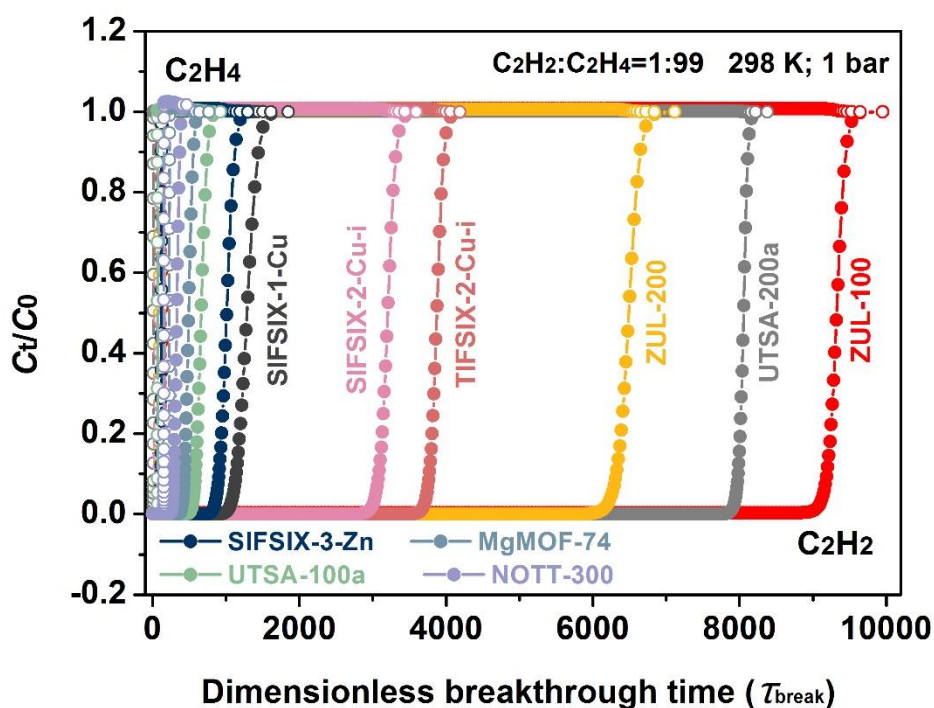

Supplementary Figure 39. Simulated column breakthrough curves for  $C_2H_2/C_2H_4$  separation with respect to various MOF materials as indicated.

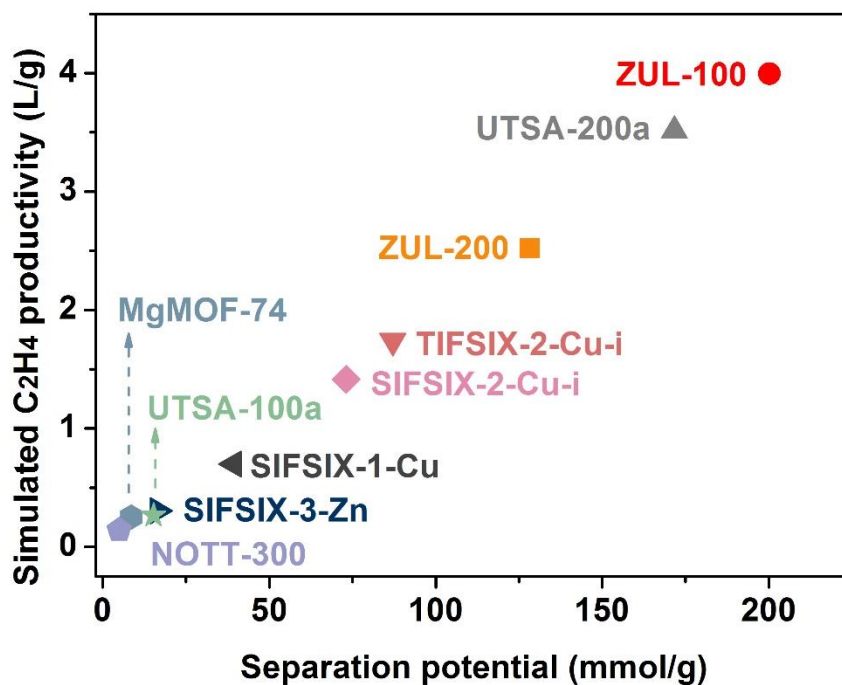

Supplementary Figure 40. Plots of the productivity of purified  $C_2H_4$  (<40 ppm  $C_2H_2$ ) from transient breakthrough simulation as a function of separation potential from IAST calculation for  $C_2H_2/C_2H_4$  (1/99) mixture for various MOF materials as indicated.



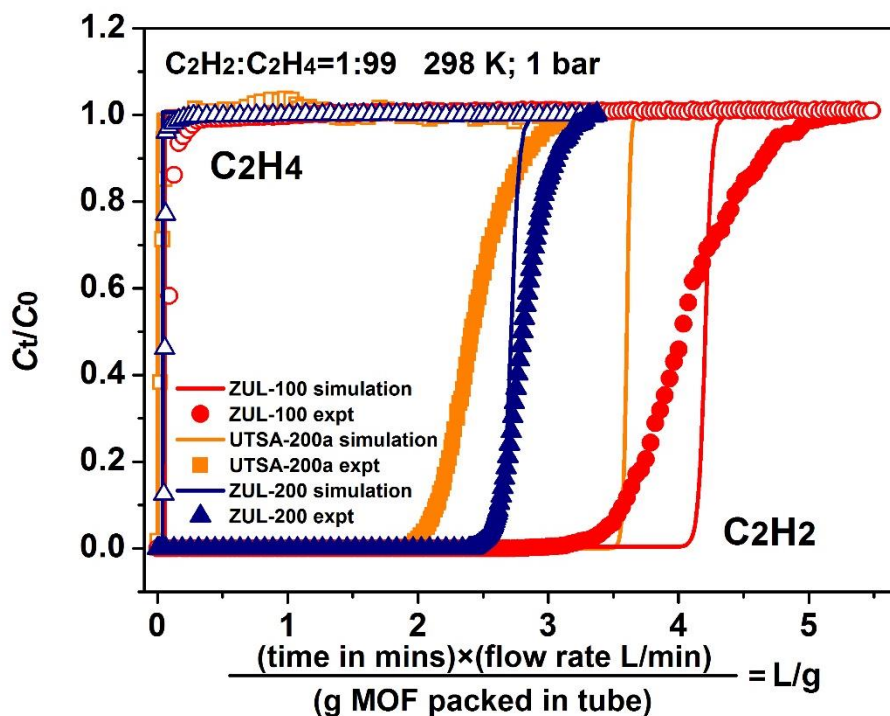

Supplementary Figure 41. Experimental breakthrough data and simulated transient breakthrough of C<sub>2</sub>H<sub>2</sub>:C<sub>2</sub>H<sub>4</sub>=1:99 mixture through fixed bed adsorbents packed with ZUL-100, ZUL-200 and UTSA-200 operating at 298 K and 1bar.

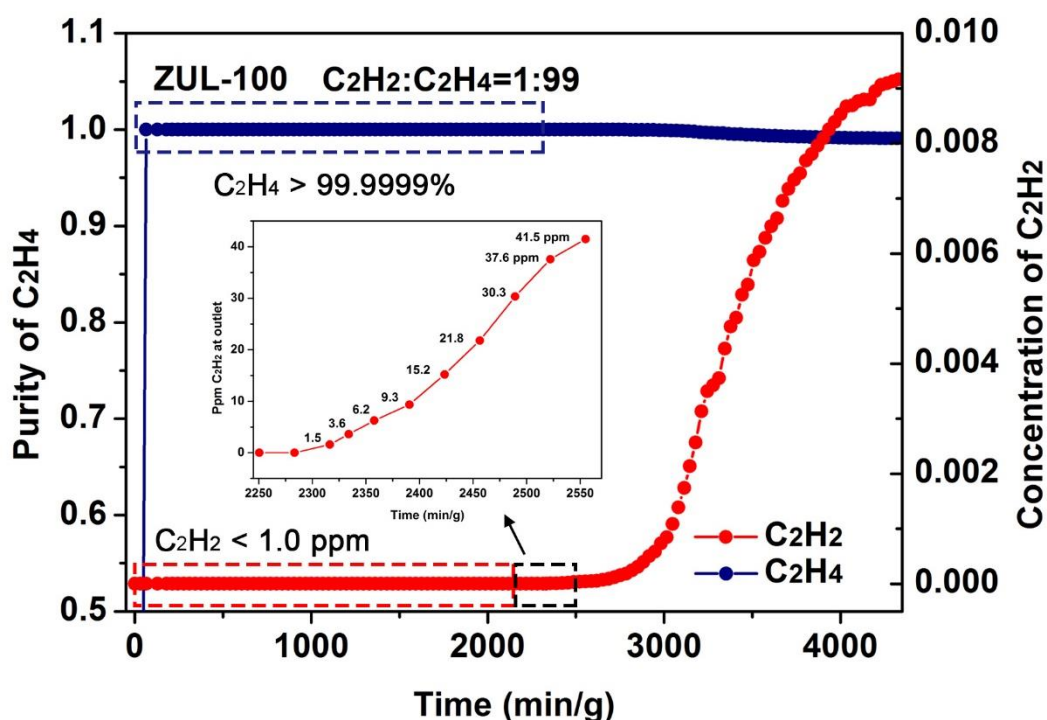

Supplementary Figure 42. The concentration of C<sub>2</sub>H<sub>2</sub> and the purity of C<sub>2</sub>H<sub>4</sub> in the outlet gas of the adsorber. The inserted figure shows the C<sub>2</sub>H<sub>2</sub> content in the outlet gas in ppm. Experimental breakthrough was conducted on a stainless steel column packed with ZUL-100 (4.6×50 mm) with C<sub>2</sub>H<sub>2</sub>/C<sub>2</sub>H<sub>4</sub> (1/99) mixtures as feed gas at 1.25 ml/min, 298 K and 1 bar.

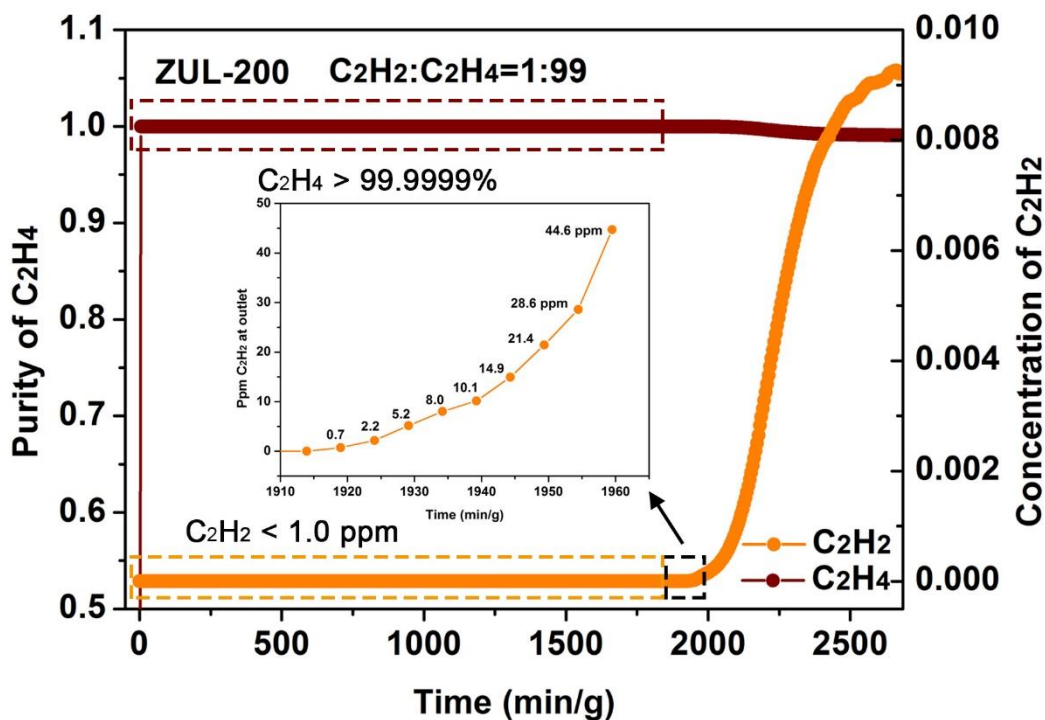

Supplementary Figure 43. The concentration of  $C_2H_2$  and the purity of  $C_2H_4$  in the outlet gas of the adsorber. The inserted figure shows the  $C_2H_2$  content in the outlet gas in ppm. Experimental breakthrough was conducted on a stainless steel column packed with ZUL-200 ( $4.6 \times 50$  mm) with  $C_2H_2/C_2H_4$  (1/99) mixtures as feed gas at 1.25 ml/min, 298 K and 1 bar.

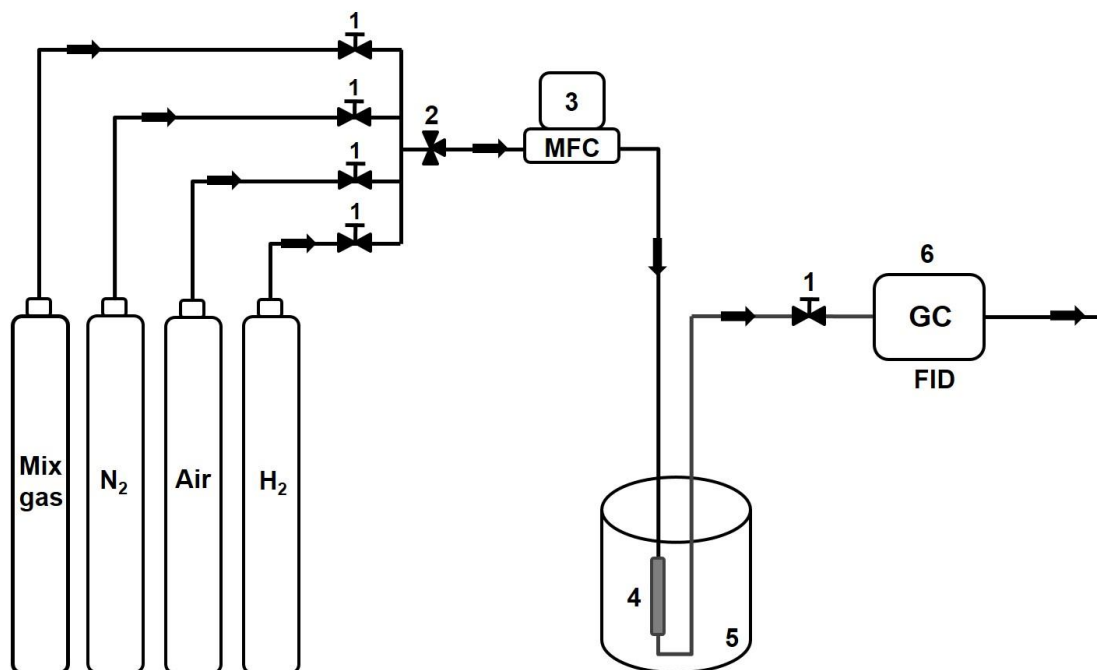

Supplementary Figure 44. The schematic breakthrough experiments device. 1. Valve 2. 3-way valve 3. Mass flow controller 4. Column 5. Mantle heater 6. Gas chromatography with FID monitor

**Supplementary Table 1-13**

Supplementary Table 1. Crystal structure data and refinement condition for as-synthesized ZUL-220

| Unit cell parameters |                                                                                      |
|----------------------|--------------------------------------------------------------------------------------|
| Formula sum          | C <sub>20</sub> H <sub>16</sub> N <sub>4</sub> O F <sub>5</sub> S <sub>2</sub> Cu Nb |
| Formula weight       | 643.94                                                                               |
| Crystal system       | Orthorhombic                                                                         |
| Space-group          | Ibam                                                                                 |
| Cell parameters      | a=19.3295(17) Å b=9.8077(9) Å<br>c=16.4662(15) Å                                     |
| Cell ratio           | a=b=c=90°                                                                            |
| Cell volume          | 3121.6(5) Å <sup>3</sup>                                                             |
| Z                    | 4                                                                                    |
| Calc. density        | 1.37016 g/cm <sup>3</sup>                                                            |

Supplementary Table 2. Crystal structure data and refinement condition for activated ZUL-220

| Unit cell parameters |                                                                                      |
|----------------------|--------------------------------------------------------------------------------------|
| Formula sum          | C <sub>20</sub> H <sub>16</sub> N <sub>4</sub> O F <sub>5</sub> S <sub>2</sub> Cu Nb |
| Formula weight       | 643.94                                                                               |
| Crystal system       | Monoclinic                                                                           |
| Space-group          | P 2                                                                                  |
| Cell parameters      | a=9.8642(9) Å b=8.2564(6) Å<br>c=16.8333(13) Å                                       |
| Cell ratio           | a=90° b=97.045° c=90°                                                                |
| Cell volume          | 1360.60(19) Å <sup>3</sup>                                                           |
| Z                    | 2                                                                                    |
| Calc. density        | 1.57178 g/cm <sup>3</sup>                                                            |

Supplementary Table 3. Crystal structure data and refinement condition for as-synthesized ZUL-210

| Unit cell parameters |                                                                                                   |
|----------------------|---------------------------------------------------------------------------------------------------|
| Formula sum          | C <sub>20</sub> H <sub>16</sub> N <sub>4</sub> O <sub>3</sub> F <sub>5</sub> S <sub>2</sub> Cu Nb |
| Formula weight       | 675.94                                                                                            |
| Crystal system       | Orthorhombic                                                                                      |
| Space-group          | Cmmm                                                                                              |
| Cell parameters      | a=9.6213(8) Å b=19.0396(17) Å<br>c=8.6179(8) Å                                                    |
| Cell ratio           | a=b=c=90°                                                                                         |
| Cell volume          | 1578.7(2) Å <sup>3</sup>                                                                          |
| Z                    | 2                                                                                                 |
| Calc. density        | 1.42197 g/cm <sup>3</sup>                                                                         |

Supplementary Table 4. Crystal structure data and refinement condition for activated ZUL-210

| Unit cell parameters |                                                                                                   |
|----------------------|---------------------------------------------------------------------------------------------------|
| Formula sum          | C <sub>20</sub> H <sub>16</sub> N <sub>4</sub> O <sub>3</sub> F <sub>5</sub> S <sub>2</sub> Cu Nb |
| Formula weight       | 675.94                                                                                            |
| Crystal system       | Orthorhombic                                                                                      |
| Space-group          | Cmmm                                                                                              |
| Cell parameters      | a=9.789(3) Å b=19.102(7) Å c=8.381(2) Å                                                           |
| Cell ratio           | a=b=c=90°                                                                                         |
| Cell volume          | 1567.1(8) Å <sup>3</sup>                                                                          |
| Z                    | 2                                                                                                 |
| Calc. density        | 1.43242 g/cm <sup>3</sup>                                                                         |

Supplementary Table 5. Crystal structure data and refinement condition for as-synthesized ZUL-200

| Unit cell parameters |                                                                                                   |
|----------------------|---------------------------------------------------------------------------------------------------|
| Formula sum          | C <sub>20</sub> H <sub>16</sub> N <sub>4</sub> O <sub>5</sub> F <sub>5</sub> S <sub>2</sub> Cu Nb |
| Formula weight       | 707.94                                                                                            |
| Crystal system       | Orthorhombic                                                                                      |
| Space-group          | Cmmm                                                                                              |
| Cell parameters      | a=9.8421(5) Å b=19.0521(10) Å c=8.7095(5) Å                                                       |
| Cell ratio           | a=b=c=90°                                                                                         |
| Cell volume          | 1633.14(15) Å <sup>3</sup>                                                                        |
| Z                    | 2                                                                                                 |
| Calc. density        | 1.43962 g/cm <sup>3</sup>                                                                         |

Supplementary Table 6. Crystal structure data and refinement condition for activated ZUL-200

| Unit cell parameters |                                                                                                   |
|----------------------|---------------------------------------------------------------------------------------------------|
| Formula sum          | C <sub>20</sub> H <sub>16</sub> N <sub>4</sub> O <sub>5</sub> F <sub>5</sub> S <sub>2</sub> Cu Nb |
| Formula weight       | 707.94                                                                                            |
| Crystal system       | Orthorhombic                                                                                      |
| Space-group          | Pmmn                                                                                              |
| Cell parameters      | a=9.8447(15) Å b=19.122(3) Å c=8.5540(15) Å                                                       |
| Cell ratio           | a=b=c=90°                                                                                         |
| Cell volume          | 1610.3(5) Å <sup>3</sup>                                                                          |
| Z                    | 2                                                                                                 |
| Calc. density        | 1.46005 g/cm <sup>3</sup>                                                                         |

Supplementary Table 7. Crystal structure data and refinement condition for as-synthesized ZUL-100

| Unit cell parameters |                                                                                                   |
|----------------------|---------------------------------------------------------------------------------------------------|
| Formula sum          | C <sub>20</sub> H <sub>16</sub> N <sub>4</sub> O <sub>4</sub> F <sub>6</sub> S <sub>2</sub> Cu Ti |
| Formula weight       | 665.93                                                                                            |
| Crystal system       | Orthorhombic                                                                                      |
| Space-group          | Cmmm                                                                                              |
| Cell parameters      | a=9.8088(16) Å b=19.283(3) Å<br>c=8.6328(12) Å                                                    |
| Cell ratio           | a=b=c=90°                                                                                         |
| Cell volume          | 1632.83(4) Å <sup>3</sup>                                                                         |
| Z                    | 2                                                                                                 |
| Calc. density        | 1.35445 g/cm <sup>3</sup>                                                                         |

Supplementary Table 8. Crystal structure data and refinement condition for C<sub>2</sub>H<sub>2</sub>@ZUL-200

| Unit cell parameters |                                                                                                   |
|----------------------|---------------------------------------------------------------------------------------------------|
| Formula sum          | C <sub>24</sub> H <sub>20</sub> N <sub>4</sub> O <sub>5</sub> F <sub>5</sub> S <sub>2</sub> Cu Nb |
| Formula weight       | 760.01                                                                                            |
| Crystal system       | Orthorhombic                                                                                      |
| Space-group          | Cmmm                                                                                              |
| Cell parameters      | a=9.8345(6) Å b=19.1172(15) Å<br>c=8.5600(5) Å                                                    |
| Cell ratio           | a=b=c=90°                                                                                         |
| Cell volume          | 1609.35(19) Å <sup>3</sup>                                                                        |
| Z                    | 2                                                                                                 |
| Calc. density        | 1.56837 g/cm <sup>3</sup>                                                                         |

Supplementary Table 9. Langmuir-Freundlich parameter fits for C<sub>2</sub>H<sub>2</sub> and C<sub>2</sub>H<sub>4</sub> in ZUL-100 at 298 K

|                               | Site A                  |                           |         | Site B                  |                           |         |
|-------------------------------|-------------------------|---------------------------|---------|-------------------------|---------------------------|---------|
|                               | $q_{A,sat}$<br>(mmol/g) | $b_A$ (Pa <sup>-1</sup> ) | $\nu_A$ | $q_{B,sat}$<br>(mmol/g) | $b_B$ (Pa <sup>-1</sup> ) | $\nu_B$ |
| C <sub>2</sub> H <sub>2</sub> | 3.8                     | 6.663E-03                 | 0.43    | 3.54                    | 5.008E-02                 | 0.57    |
| C <sub>2</sub> H <sub>4</sub> | 1.6                     | 1.689E-05                 | 1       | 1.8                     | 2.454E-04                 | 1       |

Supplementary Table 10. Langmuir-Freundlich parameter fits for C<sub>2</sub>H<sub>2</sub> and C<sub>2</sub>H<sub>4</sub> in ZUL-200 at 298 K

|                               | Site A                  |                           |         | Site B                  |                           |         |
|-------------------------------|-------------------------|---------------------------|---------|-------------------------|---------------------------|---------|
|                               | $q_{A,sat}$<br>(mmol/g) | $b_A$ (Pa <sup>-1</sup> ) | $\nu_A$ | $q_{B,sat}$<br>(mmol/g) | $b_B$ (Pa <sup>-1</sup> ) | $\nu_B$ |
| C <sub>2</sub> H <sub>2</sub> | 2.7                     | 4.479E-03                 | 1       | 2.2                     | 6.867E-05                 | 1       |
| C <sub>2</sub> H <sub>4</sub> | 1.25                    | 1.290E-05                 | 1       | 1.35                    | 1.421E-04                 | 1       |

Supplementary Table 11. The C<sub>2</sub>H<sub>4</sub> productivity calculation parameters in breakthrough experiment for C<sub>2</sub>H<sub>2</sub>/C<sub>2</sub>H<sub>4</sub> (1/99, v/v) mixture on various MOF materials

|               | $F$ (ml/min) | $t$ (min/g) (C <sub>2</sub> H <sub>2</sub> < 40 ppm) | Ref.      |
|---------------|--------------|------------------------------------------------------|-----------|
| ZUL-100       | 1.25         | 2546                                                 | This work |
| ZUL-200       | 1.25         | 1958                                                 | This work |
| UTSA-200a     | 1.25         | 1650                                                 | 1         |
| TIFSIX-2-Cu-i | 10           | 185.9                                                | 3         |
| ZU-33         | 1.25         | 1625                                                 | 4         |
| SIFSIX-2-Cu-i | 1.25         | 952                                                  | 5         |
| SIFSIX-1-Cu   | 1.25         | 330                                                  | 5         |
| SIFSIX-3-Zn   | 1.25         | 56                                                   | 5         |
| UTSA-100a     | 2            | 15                                                   | 8         |

Supplementary Table 12. The volumetric uptake of C<sub>2</sub>H<sub>2</sub> and C<sub>2</sub>H<sub>4</sub> in various MOFs including ZUL-100 and ZUL-200

|                            | C <sub>2</sub> H <sub>2</sub> uptake at 0.01 bar (mmol/ml), 298 K | C <sub>2</sub> H <sub>2</sub> uptake at 1.0 bar (mmol/ml), 298 K | C <sub>2</sub> H <sub>4</sub> uptake at 1.0 bar (mmol/ml), 298 K |
|----------------------------|-------------------------------------------------------------------|------------------------------------------------------------------|------------------------------------------------------------------|
| ZUL-100                    | 4.01                                                              | 7.19                                                             | 3.74                                                             |
| ZUL-200                    | 3.26                                                              | 6.85                                                             | 2.91                                                             |
| UTSA-200a <sup>1</sup>     | 2.59                                                              | 5.18                                                             | 0.89                                                             |
| NKMOF-1-Ni <sup>2</sup>    | 3.03                                                              | 4.77                                                             | 3.70                                                             |
| TIFSIX-2-Cu-i <sup>3</sup> | 2.42                                                              | 5.84                                                             | 3.56                                                             |
| ZU-33 <sup>4</sup>         | 2.75                                                              | 5.31                                                             | 0.98                                                             |
| SIFSIX-2-Cu-i <sup>5</sup> | 2.02                                                              | 5.01                                                             | 2.73                                                             |
| SIFSIX-3-Zn <sup>5</sup>   | 1.34                                                              | 5.73                                                             | 3.53                                                             |
| SIFSIX-1-Cu <sup>5</sup>   | 0.39                                                              | 7.34                                                             | 3.53                                                             |
| UTSA-100a <sup>8</sup>     | 0.91 <sup>a</sup>                                                 | 4.89 <sup>a</sup>                                                | 1.90 <sup>a</sup>                                                |
| NOTT-300 <sup>9</sup>      | 0.19 <sup>b</sup>                                                 | 6.73 <sup>b</sup>                                                | 4.55 <sup>b</sup>                                                |
| MgMOF-74 <sup>15</sup>     | 2.01 <sup>a</sup>                                                 | 6.80 <sup>a</sup>                                                | 6.04 <sup>a</sup>                                                |

<sup>a</sup> At a temperature of 296 K

<sup>b</sup> At a temperature of 293 K

Supplementary Table 13. Comparison of the adsorption uptakes,  $Q_{st}$  data, selectivity of C<sub>2</sub>H<sub>2</sub>/C<sub>2</sub>H<sub>4</sub> for various MOFs including ZUL-100 and ZUL-200.

|                            | Dimension | $S_{BET}^a$<br>(m <sup>2</sup> /g,<br>BET) | Pore size (Å)          | C <sub>2</sub> H <sub>2</sub> uptake at 0.01<br>bar (mmol/g), 298 K | C <sub>2</sub> H <sub>2</sub> uptake at 1.0<br>bar (mmol/g), 298<br>K | C <sub>2</sub> H <sub>4</sub> uptake at 1.0 bar<br>(mmol/g), 298 K | Selectivities for C <sub>2</sub> H <sub>2</sub><br>/ C <sub>2</sub> H <sub>4</sub> at 1/99<br>mixtures 1 bar | $Q_{st}$<br>(C <sub>2</sub> H <sub>2</sub> ,KJ/mol) <sup>b</sup> |
|----------------------------|-----------|--------------------------------------------|------------------------|---------------------------------------------------------------------|-----------------------------------------------------------------------|--------------------------------------------------------------------|--------------------------------------------------------------------------------------------------------------|------------------------------------------------------------------|
| ZUL-100                    | 2D        | 548                                        | 3.6×4.1<br>3.1×4.4     | 2.96                                                                | 5.31                                                                  | 2.76                                                               | 175                                                                                                          | 65.3                                                             |
| ZUL-200                    | 2D        | 471                                        | 3.6×4.1<br>3.3×4.4     | 2.23                                                                | 4.69                                                                  | 1.99                                                               | 114                                                                                                          | 57.6                                                             |
| UTSA-200a <sup>1</sup>     | 3D        | 612                                        | 3.4×3.4                | 1.85                                                                | 3.65                                                                  | 0.63                                                               | 6320                                                                                                         | 40                                                               |
| NKMOF-1-Ni <sup>2</sup>    | 3D        | 380                                        | 5.75×5.75              | 1.73                                                                | 2.72                                                                  | 2.11                                                               | 51.65                                                                                                        | 18.8/54 <sup>g</sup>                                             |
| TIFSIX-2-Cu-i <sup>3</sup> | 3D        | 685                                        | 5.5                    | 1.70                                                                | 4.10                                                                  | 2.50                                                               | 55                                                                                                           | 46.3                                                             |
| ZU-33 <sup>4</sup>         | 3D        | 424                                        | 3.0                    | 1.66                                                                | 3.21                                                                  | 0.59                                                               | 1100                                                                                                         | 43.6                                                             |
| SIFSIX-2-Cu-i <sup>5</sup> | 3D        | 503                                        | 5.2×5.2                | 1.62                                                                | 4.02                                                                  | 2.19                                                               | 44.54                                                                                                        | 41.9                                                             |
| SIFSIX-3-Zn <sup>5</sup>   | 3D        | 250                                        | 4.2×4.2                | 0.85                                                                | 3.64                                                                  | 2.24                                                               | 8.82                                                                                                         | 21/31 <sup>g</sup>                                               |
| SIFSIX-3-Ni <sup>5</sup>   | 3D        | 368                                        | 4.2×4.2                | /                                                                   | 3.3                                                                   | 1.75                                                               | 5.03                                                                                                         | 30.5                                                             |
| SIFSIX-2-Cu <sup>5</sup>   | 3D        | 1881                                       | 10.5×10.5              | /                                                                   | 5.38                                                                  | 2.02                                                               | 6                                                                                                            | 26.3                                                             |
| SIFSIX-1-Cu <sup>5</sup>   | 3D        | 1178                                       | 8.0×8.0                | 0.45                                                                | 8.5                                                                   | 4.11                                                               | 10.63                                                                                                        | 30/37 <sup>g</sup>                                               |
| UTSA-300a <sup>6</sup>     | 2D        | 311                                        | 2.4×3.3                | 0                                                                   | 3.41                                                                  | 0.04                                                               | /                                                                                                            | 57.6                                                             |
| NKMOF-1-Cu <sup>2</sup>    | 3D        | 280                                        | 5.75×5.75              | /                                                                   | 2.28                                                                  | /                                                                  | /                                                                                                            | /                                                                |
| M'MOF-3a <sup>7</sup>      | 3D        | 110                                        | 3.4×4.8                | 0.19                                                                | 1.9 <sup>c</sup>                                                      | 0.4 <sup>c</sup>                                                   | 24.03                                                                                                        | 25                                                               |
| UTSA-100a <sup>8</sup>     | 3D        | 970                                        | 4.3×4.3                | 0.80 <sup>c</sup>                                                   | 4.27 <sup>c</sup>                                                     | 1.66 <sup>c</sup>                                                  | 10.72                                                                                                        | 22                                                               |
| NOTT-300 <sup>9</sup>      | 3D        | 1370                                       | 6.5×6.5                | 0.18                                                                | 6.34 <sup>d</sup>                                                     | 4.28 <sup>d</sup>                                                  | 2.17                                                                                                         | 32                                                               |
| FeMOF-74 <sup>10</sup>     | 3D        | 1350                                       | 11×11                  | /                                                                   | 6.8 <sup>e</sup>                                                      | 6.1 <sup>e</sup>                                                   | 2.08                                                                                                         | 46                                                               |
| ZJU-40a <sup>11</sup>      | 3D        | 2858                                       | 10.2×10.2;<br>9.6×22.3 | 0.65                                                                | 9.64                                                                  | /                                                                  | /                                                                                                            | 34.5                                                             |
| FJI-H8 <sup>12</sup>       | 3D        | 2025                                       | 15; 8; 12              | 0.7 <sup>f</sup>                                                    | 10 <sup>f</sup>                                                       | /                                                                  | /                                                                                                            | 32.0                                                             |

|                        |    |      |                |                   |                   |                   |     |      |
|------------------------|----|------|----------------|-------------------|-------------------|-------------------|-----|------|
| HKUST-1 <sup>13</sup>  | 3D | 1401 | 9×9            | 1.1 <sup>f</sup>  | 8.97 <sup>f</sup> | /                 | /   | 30.4 |
| ZJU-5a <sup>14</sup>   | 3D | 2823 | 10.5; 9.5×22.5 | 0.35              | 8.62              | /                 | /   | 35.8 |
| MgMOF-74 <sup>15</sup> | 3D | 1495 | 12             | 2.21 <sup>c</sup> | 7.48 <sup>c</sup> | 6.65 <sup>c</sup> | 2.0 | 41   |

<sup>a</sup> BET surface calculated from N<sub>2</sub> isotherms at 77 K.

<sup>b</sup>  $Q_{st}$  values at low surface coverage.

<sup>c</sup> At a temperature of 296 K

<sup>d</sup> At a temperature of 293 K

<sup>e</sup> At a temperature of 318 K

<sup>f</sup> At a temperature of 295 K

<sup>g</sup> The highest  $Q_{st}$  values at various surface coverage.



Supplementary Table 14. Lennard-Jones parameters for host atoms in ZUL-100 and ZUL-200.

| atom | $\sigma_{host}$ (Å) | $\frac{\epsilon_{host}}{k_B}$ (K) | Literature source      |
|------|---------------------|-----------------------------------|------------------------|
| Cu   | 3.1137              | 2.5164                            | UFF <sup>16</sup>      |
| F    | 3.0932              | 36.4872                           | DREIDING <sup>17</sup> |
| N    | 3.2626              | 38.9532                           | DREIDING <sup>17</sup> |
| S    | 3.5903              | 173.1253                          | DREIDING <sup>17</sup> |
| Nb   | 2.8197              | 29.6930                           | UFF <sup>16</sup>      |
| Ti   | 2.8286              | 8.5556                            | UFF <sup>16</sup>      |
| C    | 3.4730              | 47.8611                           | DREIDING <sup>17</sup> |
| O    | 3.0332              | 48.1631                           | DREIDING <sup>17</sup> |
| H    | 2.8464              | 7.6497                            | DREIDING <sup>17</sup> |

Supplementary Table 15. Lennard-Jones parameters for guest pseudo-atoms

| (pseudo-) atom   | $\sigma_{guest}$ (Å) | $\frac{\epsilon_{guest}}{k_B}$ (K) | Literature source           |
|------------------|----------------------|------------------------------------|-----------------------------|
| -CH              | 3.8                  | 57.8782776                         | Gautam et al. <sup>18</sup> |
| -CH <sub>2</sub> | 3.68                 | 92.5                               | Ban et al. <sup>19</sup>    |

Supplementary Table 16. Lennard-Jones parameters for the guest – host (F atoms) interactions.

| (pseudo-) atom   | host atom | $\sigma_{guest-host}$ (Å)            | $\frac{\epsilon_{guest-host}}{k_B}$ (K)                                                       |
|------------------|-----------|--------------------------------------|-----------------------------------------------------------------------------------------------|
| -CH              | F         | $\frac{(3.8 + 3.0932)}{2} = 3.4466$  | $6 \times \sqrt{57.87828 \times 36.4872}$<br>= 275.727<br>(This is fitted value) <sup>a</sup> |
| -CH <sub>2</sub> | F         | $\frac{(3.68 + 3.0932)}{2} = 3.3866$ | $\sqrt{92.50 \times 36.4872} = 58.09529$                                                      |

<sup>a</sup>The scaling factor 6 is artificial and cannot be used for any other simulations except fitting the experimental data to support the reliability of the IAST calculations in this work.

## Supplementary References

1. Li, B. et al. An ideal molecular sieve for acetylene removal from ethylene with record selectivity and productivity. *Adv. Mater.* **29**, 1704210-1704216 (2017).
2. Peng, Y. et al. Robust Ultramicroporous metal-organic frameworks with benchmark affinity for acetylene. *Angew. Chem. Int. Ed.* **57**, 10971-10975 (2018).
3. Bajpai, A. et al. The effect of centred versus offset interpenetration on C<sub>2</sub>H<sub>2</sub> sorption in hybrid ultramicroporous materials. *Chem. Commun.* **53**, 11592-11595 (2017).
4. Zhang, Z. et al. Hexafluorogermanate (GeFSIX) anion-functionalized hybrid ultramicroporous materials for efficiently trapping acetylene from ethylene. *Ind. Eng. Chem. Res.* **57**, 7266-7274 (2018).
5. Cui, X. et al. Pore chemistry and size control in hybrid porous materials for acetylene capture from ethylene. *Science* **353**, 141-144 (2016).
6. Lin, R. et al. Optimized separation of acetylene from carbon dioxide and ethylene in a microporous material. *J. Am. Chem. Soc.* **139**, 8022-8028 (2017).
7. Das, M. C. et al. Interplay of metalloligand and organic ligand to tune micropores within isostructural mixed-metal organic frameworks (M'MOFs) for their highly selective separation of chiral and achiral small molecules. *J. Am. Chem. Soc.* **134**, 8703-8710 (2012).
8. Hu, T. et al. Microporous metal-organic framework with dual functionalities for highly efficient removal of acetylene from ethylene/acetylene mixtures. *Nat. Commun.* **6**, 7328-7335 (2015).
9. Yang, S. et al. Supramolecular binding and separation of hydrocarbons within a functionalized porous metal-organic framework. *Nat. Chem.* **7**, 121-129 (2014).
10. Bloch, E. D. et al. Hydrocarbon separations in a metal-organic framework with open Iron(II) coordination sites. *Science* **335**, 1606-1610 (2012).
11. Wen, H. et al. A microporous metal-organic framework with Lewis basic nitrogen sites for high C<sub>2</sub>H<sub>2</sub> storage and significantly enhanced C<sub>2</sub>H<sub>2</sub>/CO<sub>2</sub> separation at ambient conditions. *Inorg. Chem.* **55**, 7214-7218 (2016).
12. Pang, J. et al. A porous metal-organic framework with ultrahigh acetylene uptake capacity under ambient conditions. *Nat. Commun.* **6**, 7575-7581 (2015).
13. Xiang, S., Zhou, W., Gallegos, J. M., Liu, Y. & Chen, B. Exceptionally high acetylene uptake in a microporous metal-organic framework with open metal sites. *J. Am. Chem. Soc.* **131**, 12415-12419 (2009).
14. Rao, X. et al. A microporous metal-organic framework with both open metal and Lewis basic pyridyl sites for high C<sub>2</sub>H<sub>2</sub> and CH<sub>4</sub> storage at room temperature. *Chem. Commun.* **49**, 6719-6721 (2013).
15. He, Y., Krishna, R. & Chen, B. Metal-organic frameworks with potential for energy-efficient adsorptive separation of light hydrocarbons. *Energy Environ. Sci.* **5**, 9107-9120 (2012).
16. Rappé, A. K. et al. UFF, A full periodic table force field for molecular mechanics and molecular dynamics simulations. *J. Am. Chem. Soc.* **114**, 10024-10035 (1992).
17. Mayo, S. L., Olafson, B. D. & Goddard, W. A. DREIDING: A generic force field for molecular simulations. *J. Phys. Chem.* **94**, 8897-8909 (1990).
18. Gautam, S. et al. Diffusion of acetylene inside Na-Y zeolite: Molecular dynamics simulation studies. *Phys. Rev. E* **74**, 041202 (2006).
19. Ban, S. et al. Adsorption selectivity of benzene and propene mixtures for various zeolites. *J. Phys. Chem. C* **111**, 17241-17248 (2007).
